# Supplementary material
Source: publisher site journal article supplement (https://www.dovepress.com/article/354879)
Supplement: Supplementary file 1 [file get_supplementary_file.php]

## Supporting Information

**Design, synthesis and biological evaluation of new 3,4-dihydro-2(1*H*)-quinolinone-dithiocarbamate derivatives as multifunctional agents for the treatment of Alzheimer's disease**

Jie Guo\*, Airen Xu\*, Maojun Cheng, Yang Wan, Rikang Wang, Yuanying Fang, Yi Jin, Sai-Sai Xie, Jing Liu

## Table of Contents

1. The  $^1\text{H}$  NMR charts of intermediates 2a-i
2. The  $^1\text{H}$  NMR,  $^{13}\text{C}$  NMR, HRMS and HPLC charts of the target compounds and 3a-i, 3e<sub>1</sub>-e<sub>11</sub>
3. The error analysis of the HRMS results
4. Molecular dynamics simulation

# 1. The <sup>1</sup>H NMR charts of intermediates 2a-i

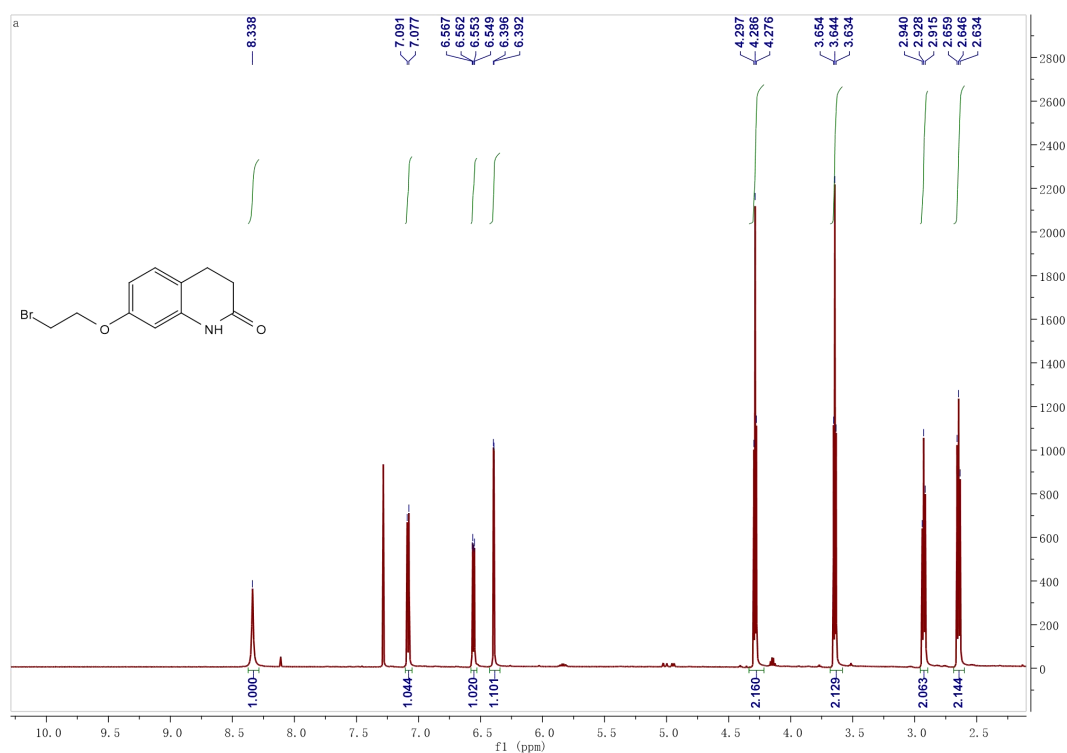

**Figure S1** <sup>1</sup>H NMR chart of compound **2a** in CDCl<sub>3</sub>.

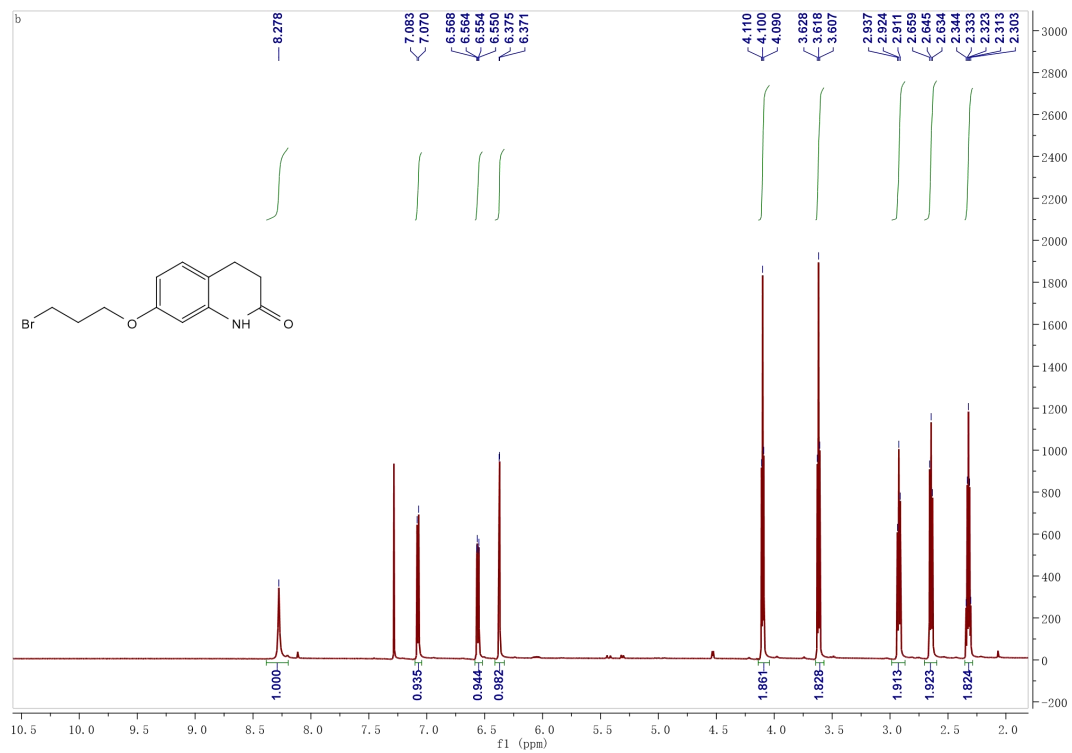

**Figure S2** <sup>1</sup>H NMR chart of compound **2b** in CDCl<sub>3</sub>.

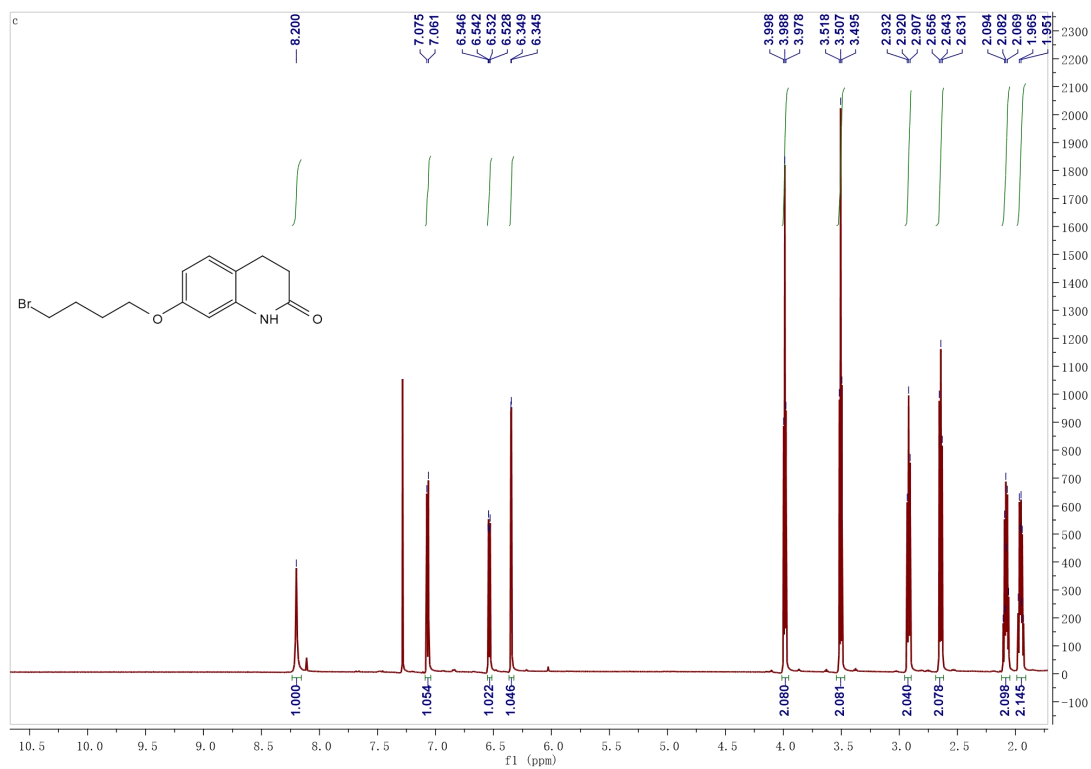

Figure S3  $^1\text{H}$  NMR chart of compound 2c in  $\text{CDCl}_3$ .

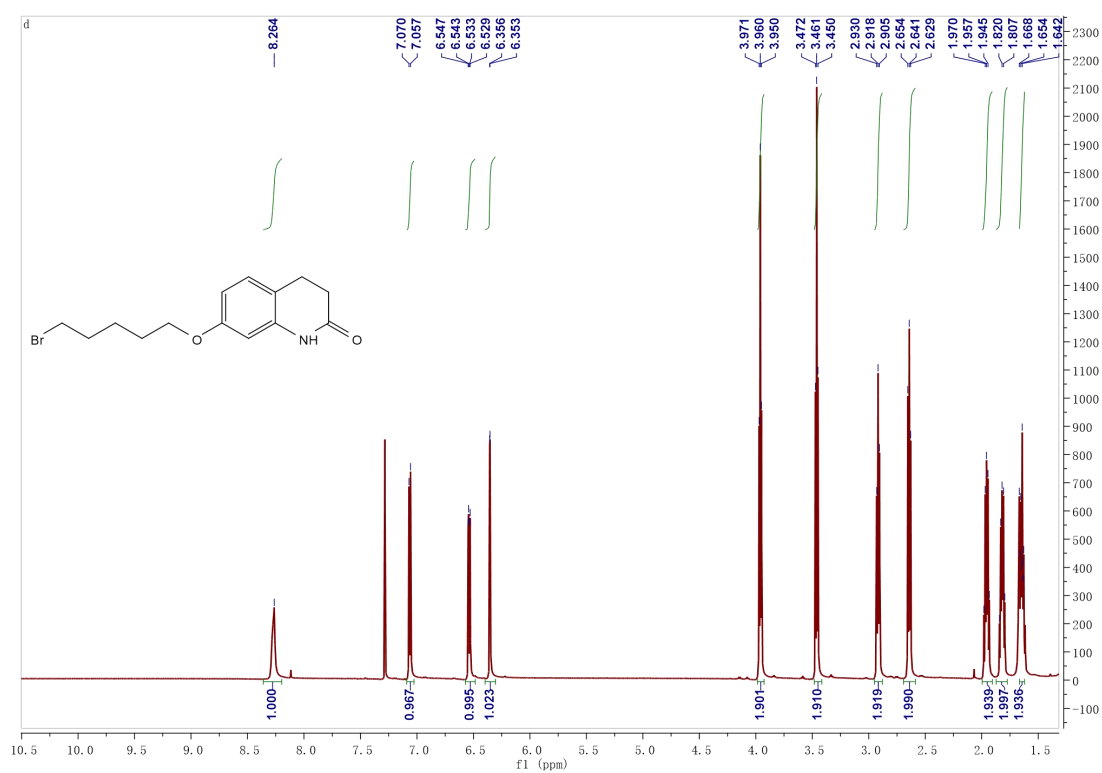

Figure S4  $^1\text{H}$  NMR chart of compound 2d in  $\text{CDCl}_3$ .



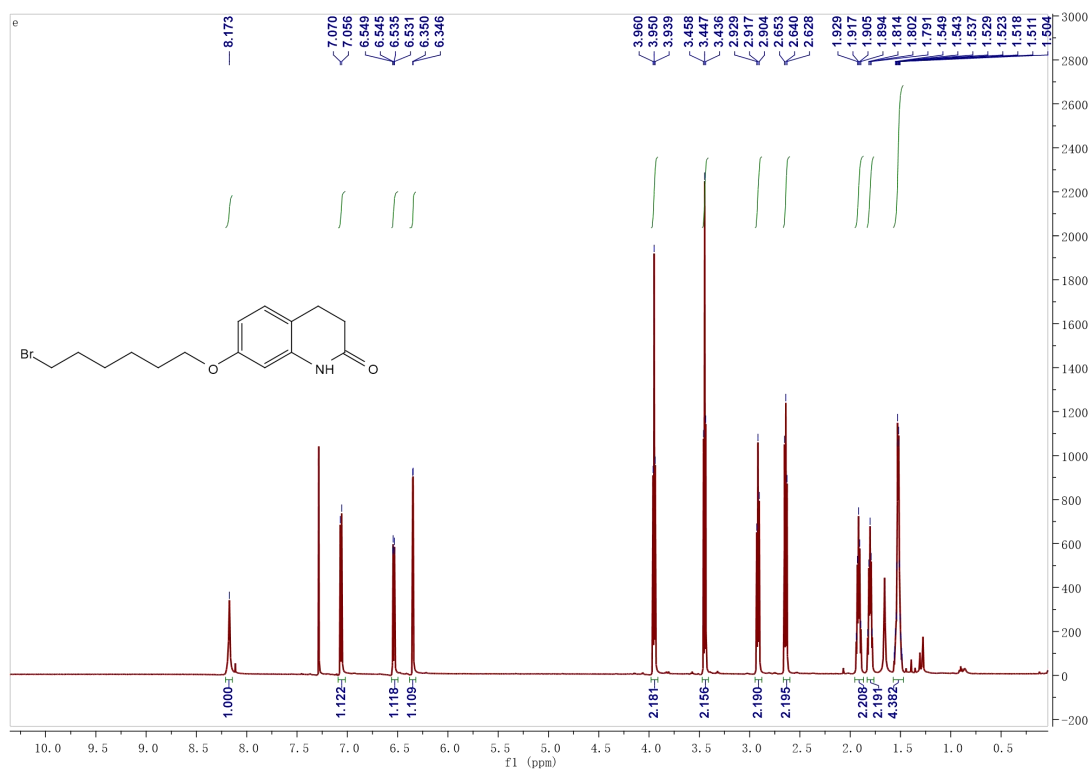

Figure S5 <sup>1</sup>H NMR chart of compound **2e** in CDCl<sub>3</sub>.

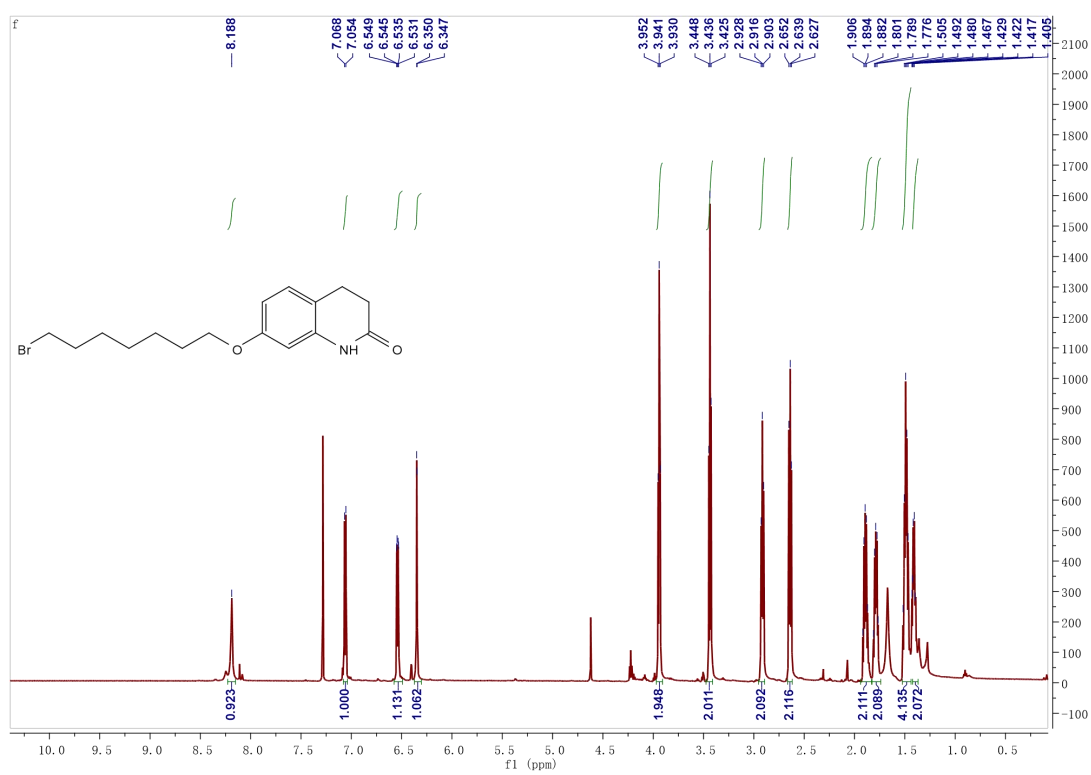

Figure S6 <sup>1</sup>H NMR chart of compound **2f** in CDCl<sub>3</sub>.

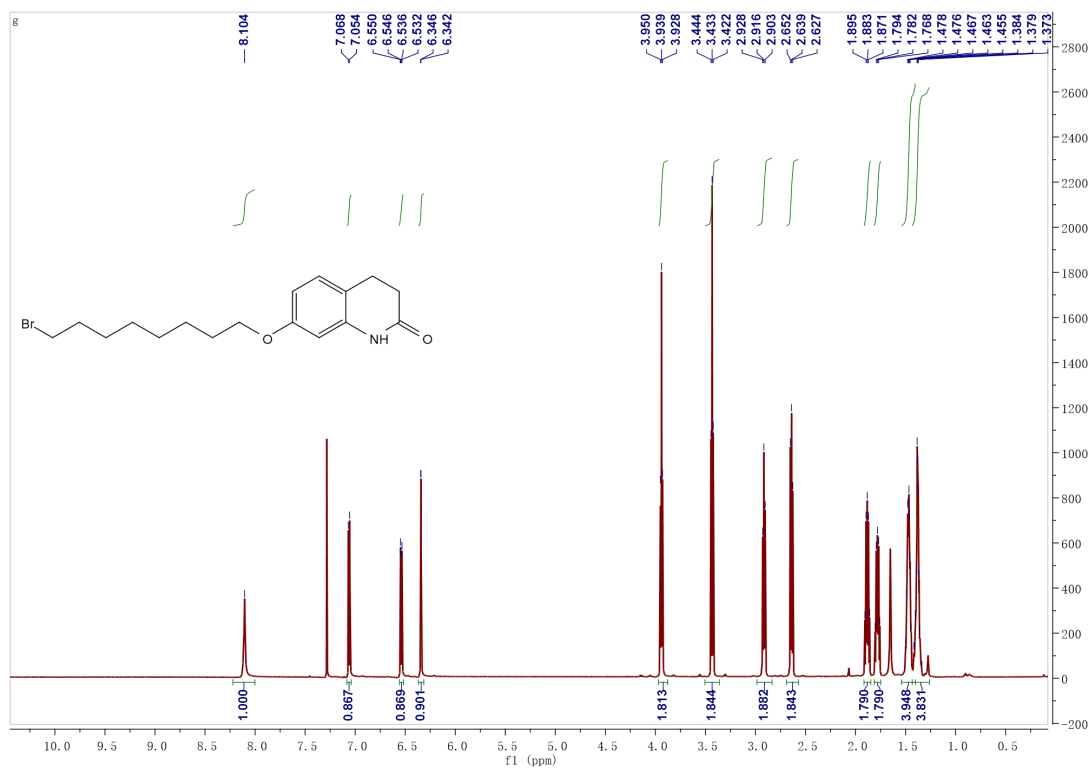

Figure S7  $^1\text{H}$  NMR chart of compound 2g in  $\text{CDCl}_3$ .

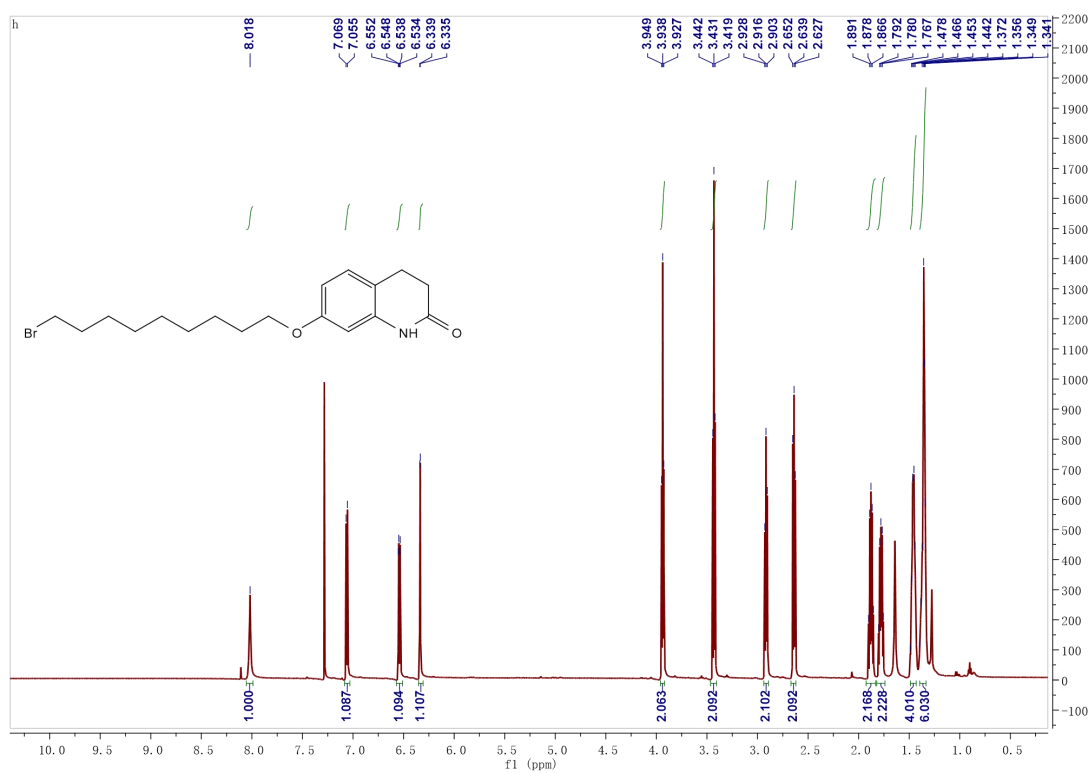

Figure S8  $^1\text{H}$  NMR chart of compound 2h in  $\text{CDCl}_3$ .

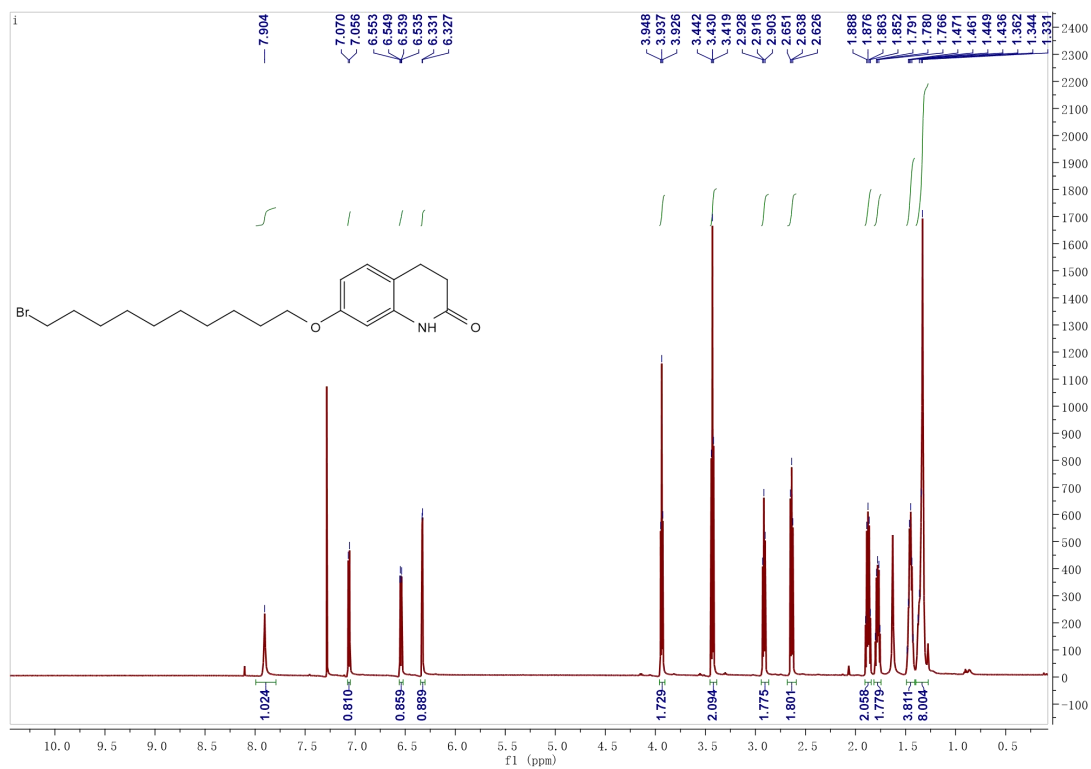

Figure S9  $^1\text{H}$  NMR chart of compound **2i** in  $\text{CDCl}_3$ .

2. The  $^1\text{H}$  NMR,  $^{13}\text{C}$  NMR, HRMS and HPLC charts of the target compounds and 3a-i, 3e<sub>1</sub>-e<sub>11</sub>

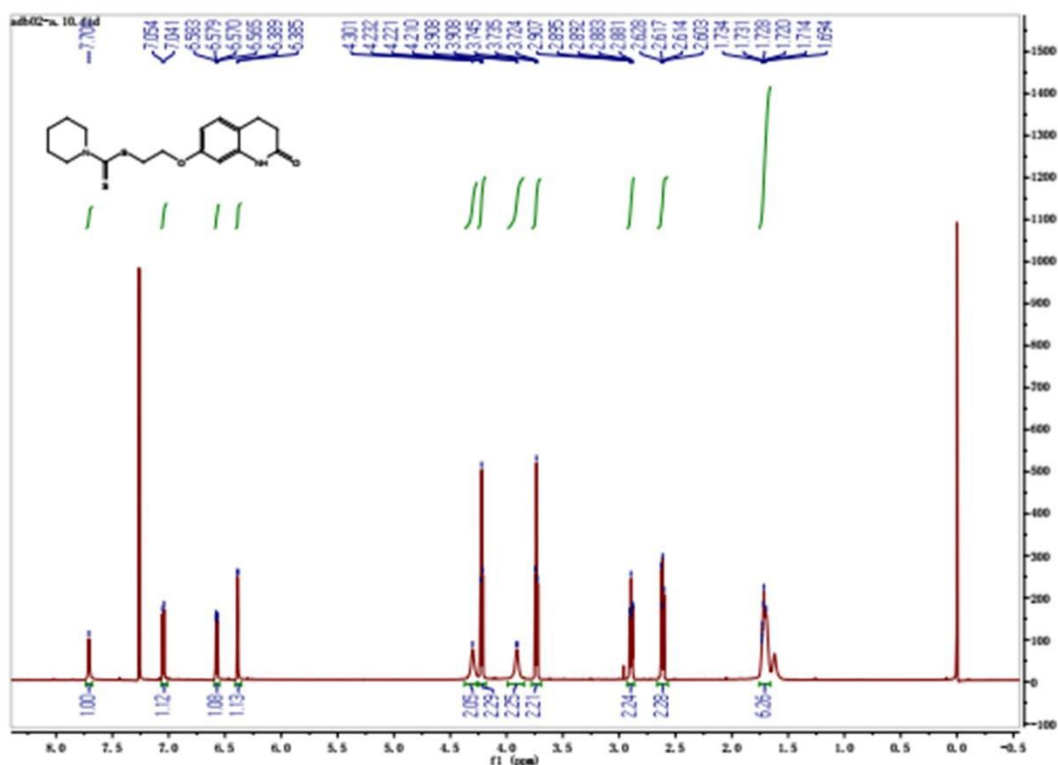

Figure S10  $^1\text{H}$  NMR chart of compound 3a in  $\text{CDCl}_3$ .

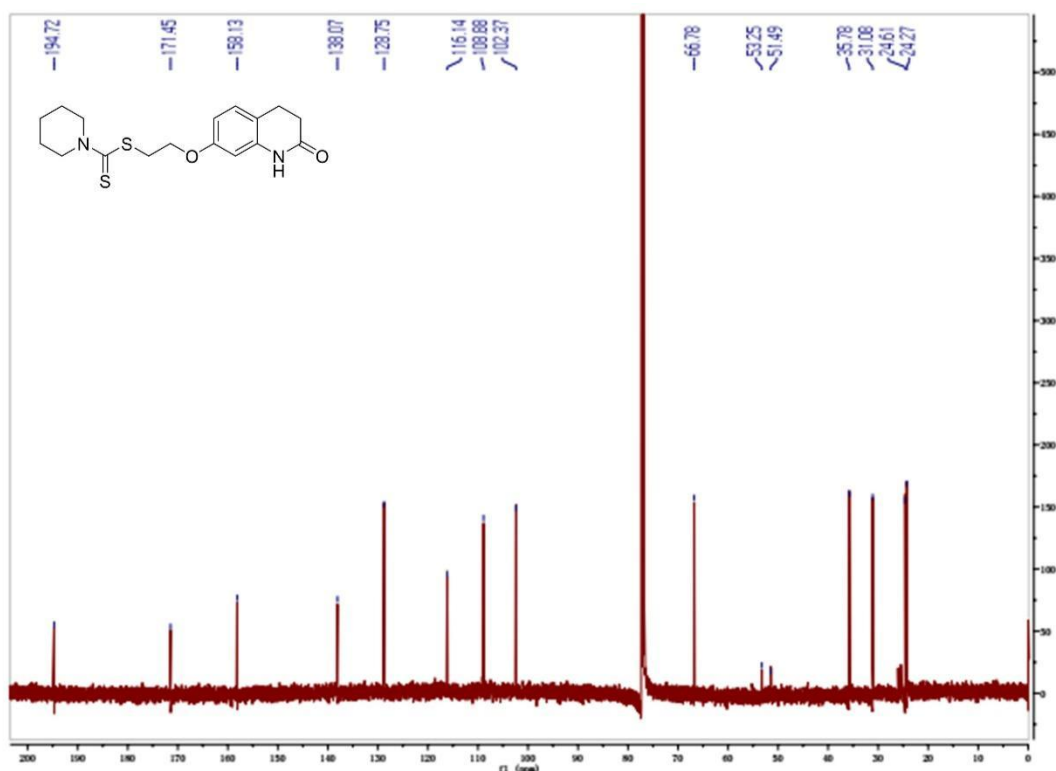

Figure S11  $^{13}\text{C}$  NMR chart of compound 3a in  $\text{CDCl}_3$ .

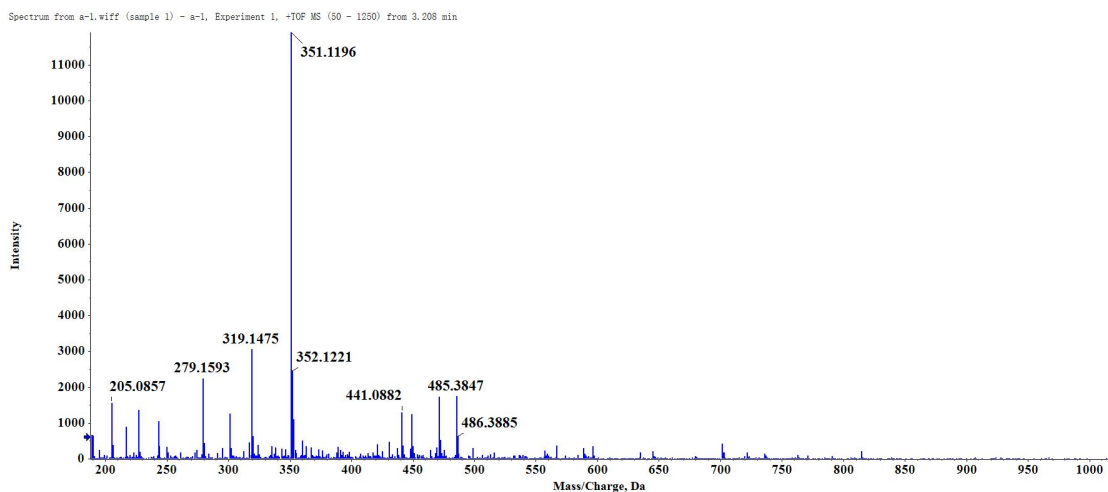

**Figure S12** HRMS (ESI) spectrum of compound **3a**.

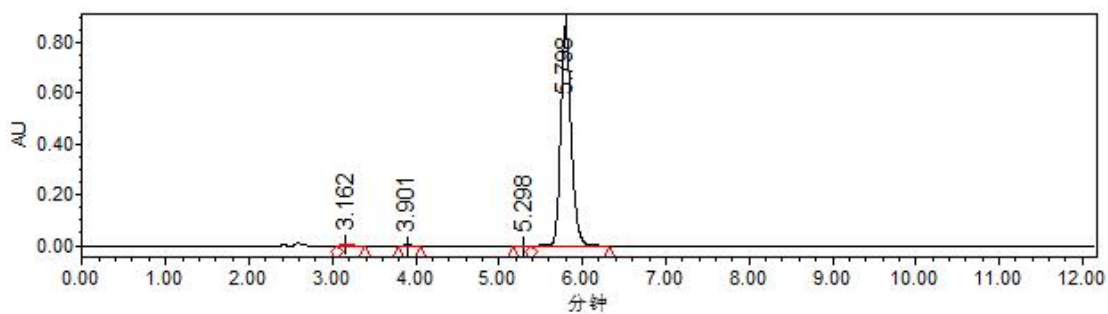

|   | Name | Retention time (min) | Area (mV*s) | %Area | Height (mV) |
|---|------|----------------------|-------------|-------|-------------|
| 1 |      | 3.162                | 37757       | 0.5   | 6928        |
| 2 |      | 3.901                | 7797        | 0.1   | 1372        |
| 3 |      | 5.298                | 2807        | 0.04  | 409         |
| 4 |      | 5.798                | 7544851     | 99.36 | 867131      |
|   |      |                      |             |       |             |

**Figure S13** Chromatographic report of HPLC analysis of compound **3a**.

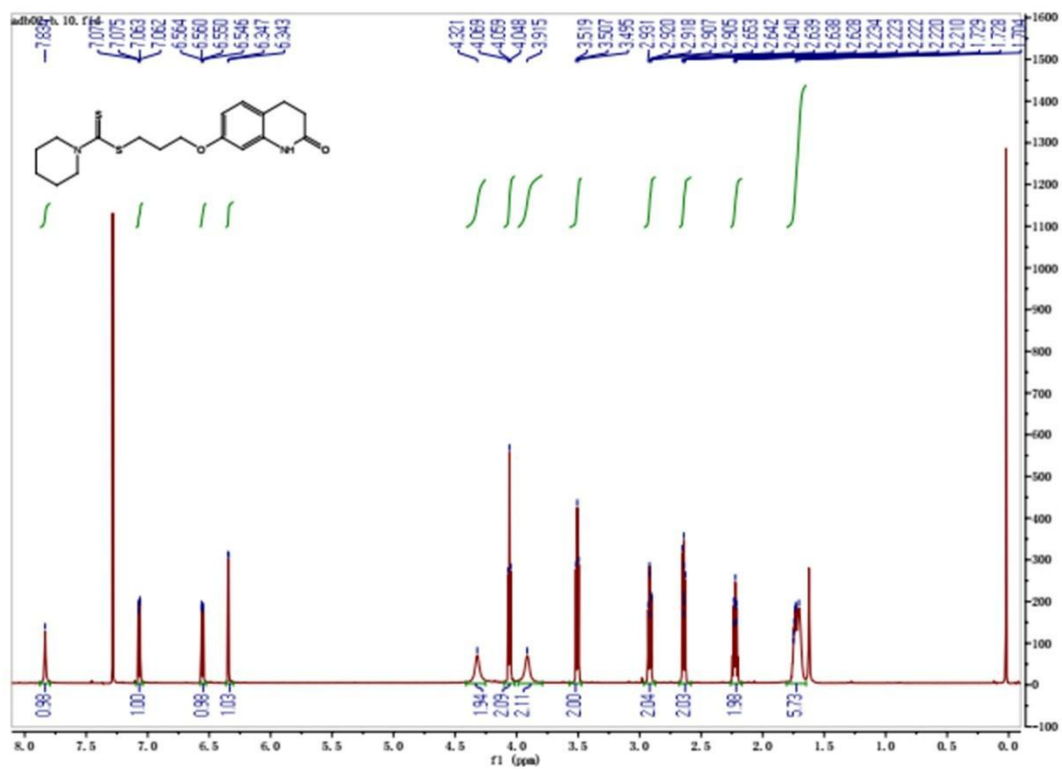

Figure S14 <sup>1</sup>H NMR chart of compound **3b** in CDCl<sub>3</sub>.

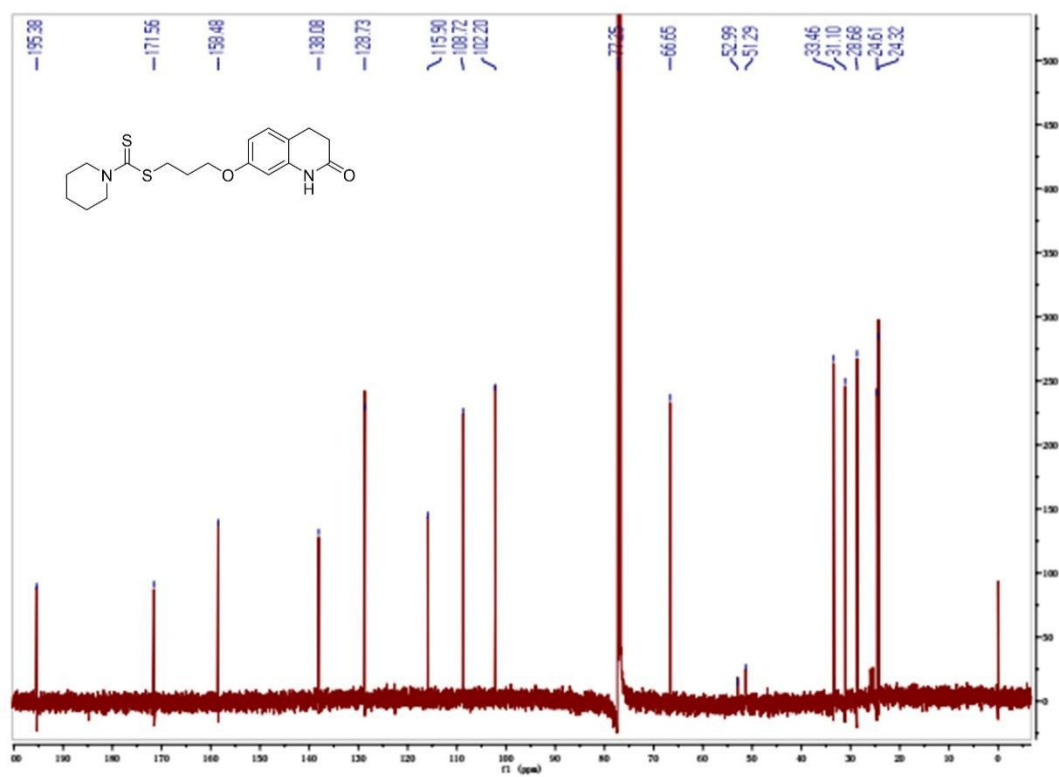

Figure S15 <sup>13</sup>C NMR chart of compound **3b** in CDCl<sub>3</sub>.

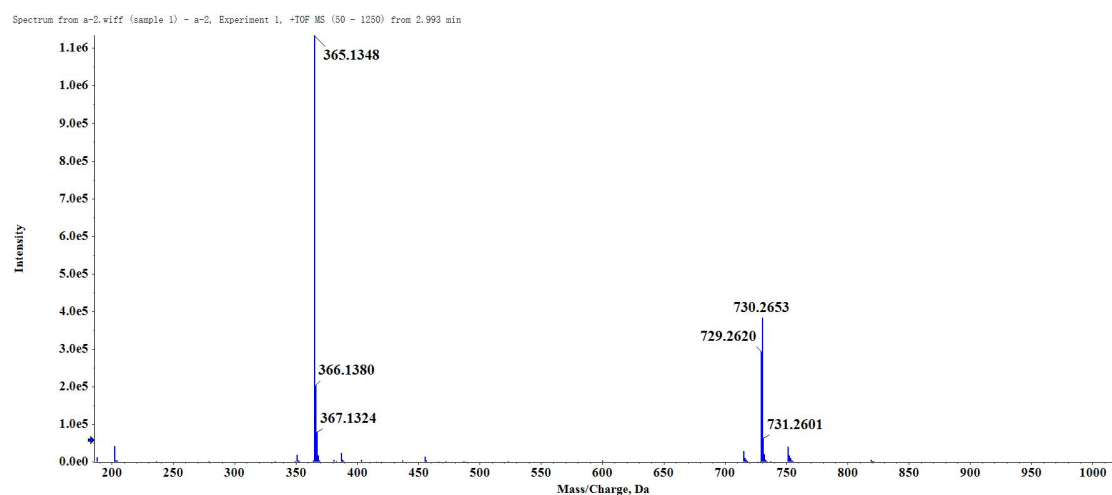

**Figure S16** HRMS (ESI) spectrum of compound **3b**.

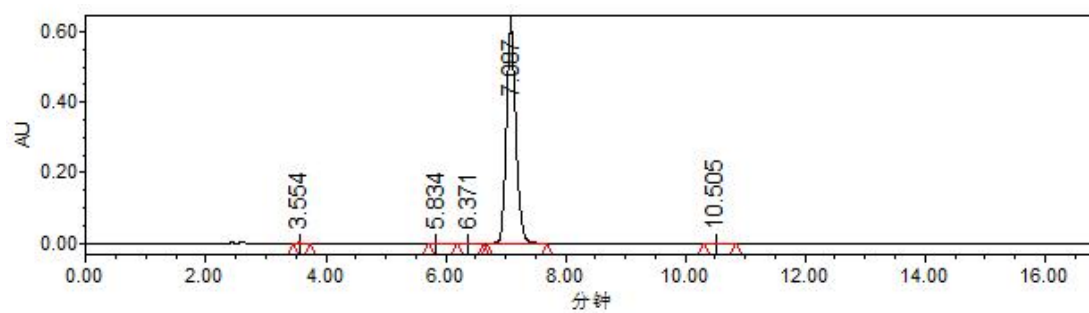

| Name | Retention time (min) | Area (mV*s) | %Area | Height (mV) |
|------|----------------------|-------------|-------|-------------|
| 1    | 3.554                | 5130        | 0.08  | 879         |
| 2    | 5.834                | 5307        | 0.08  | 458         |
| 3    | 6.371                | 3536        | 0.05  | 328         |
| 4    | 7.087                | 6803993     | 99.69 | 614030      |
| 5    | 10.505               | 6885        | 0.10  | 485         |

**Figure S17** Chromatographic report of HPLC analysis of compound **3b**.

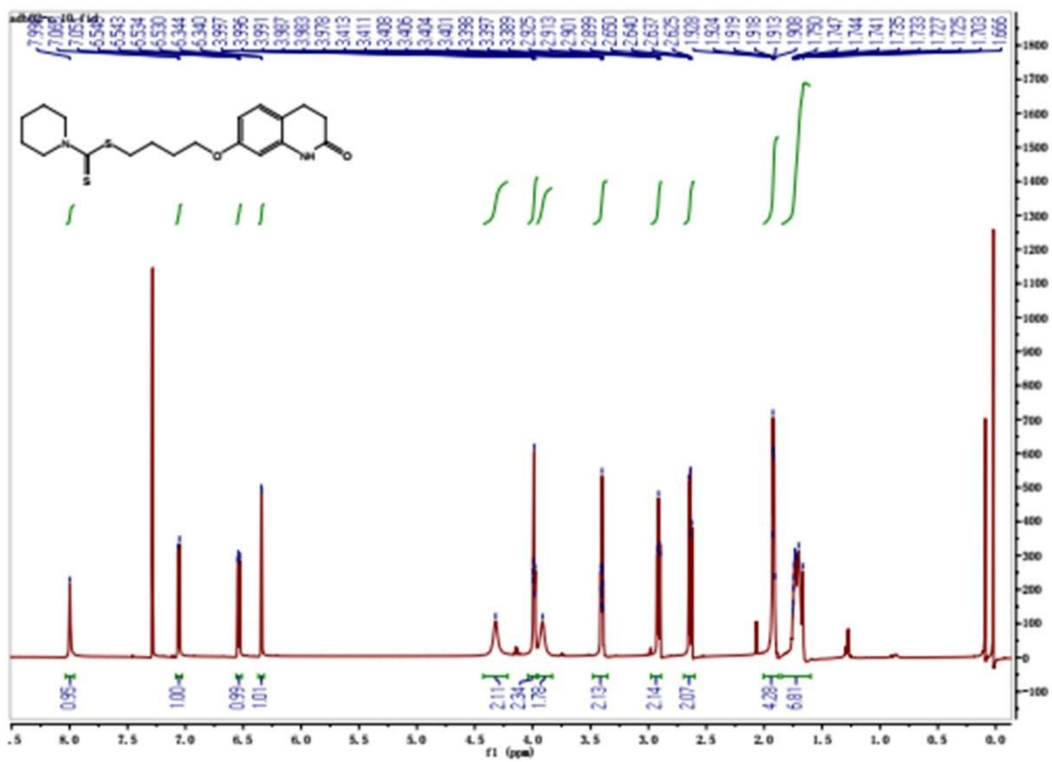

Figure S18  $^1\text{H}$  NMR chart of compound **3c** in  $\text{CDCl}_3$ .

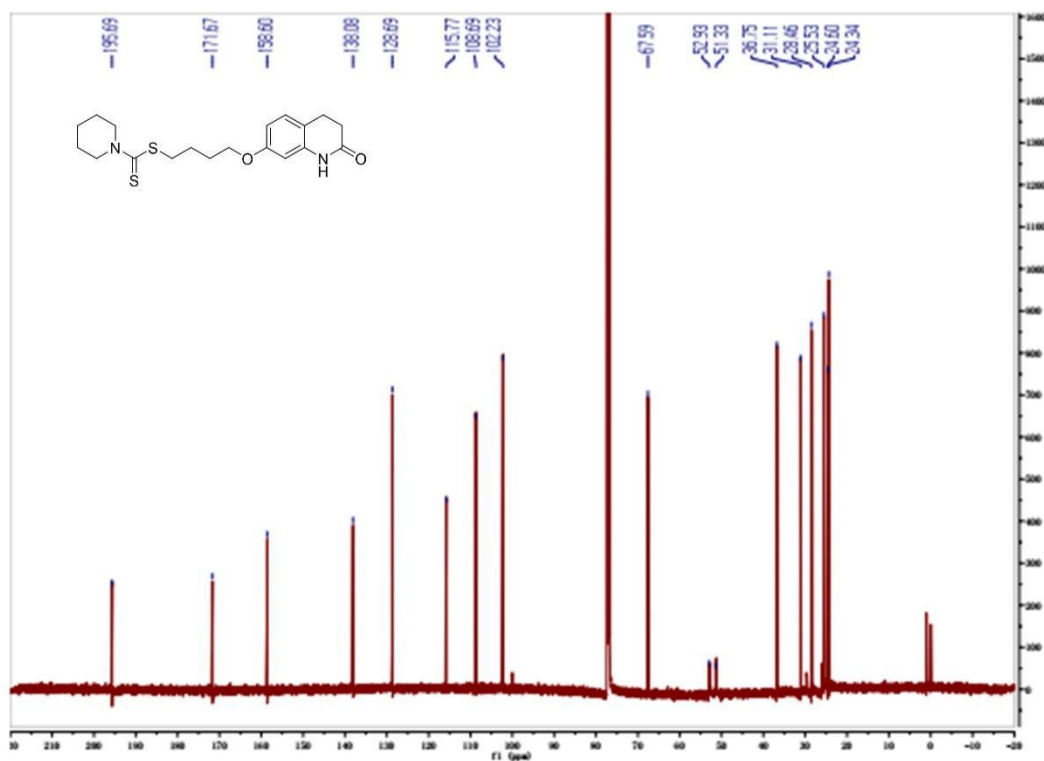

Figure S19  $^{13}\text{C}$  NMR chart of compound **3c** in  $\text{CDCl}_3$ .



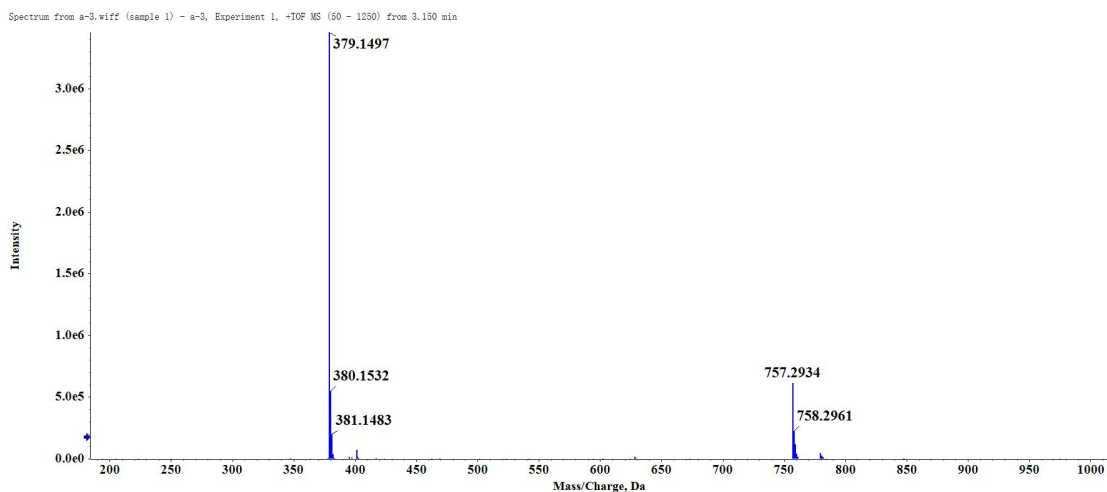

**Figure S20** HRMS (ESI) spectrum of compound **3c**.

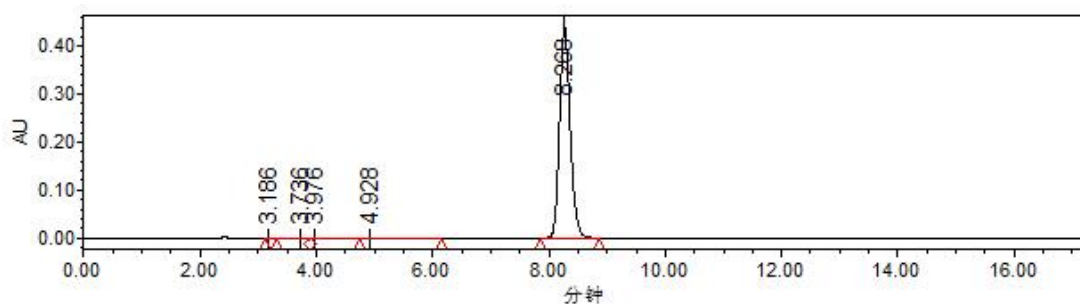

**Figure S21** Chromatographic report of HPLC analysis of compound **3c**.

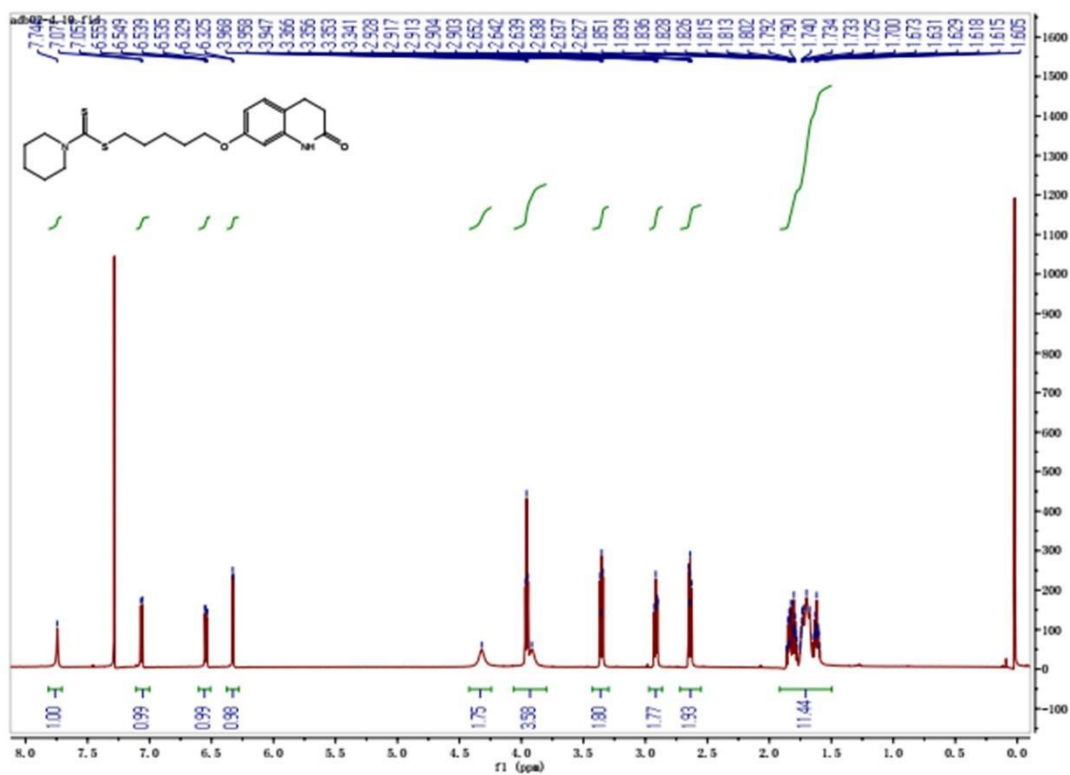

Figure S22  $^1\text{H}$  NMR chart of compound 3d in  $\text{CDCl}_3$ .

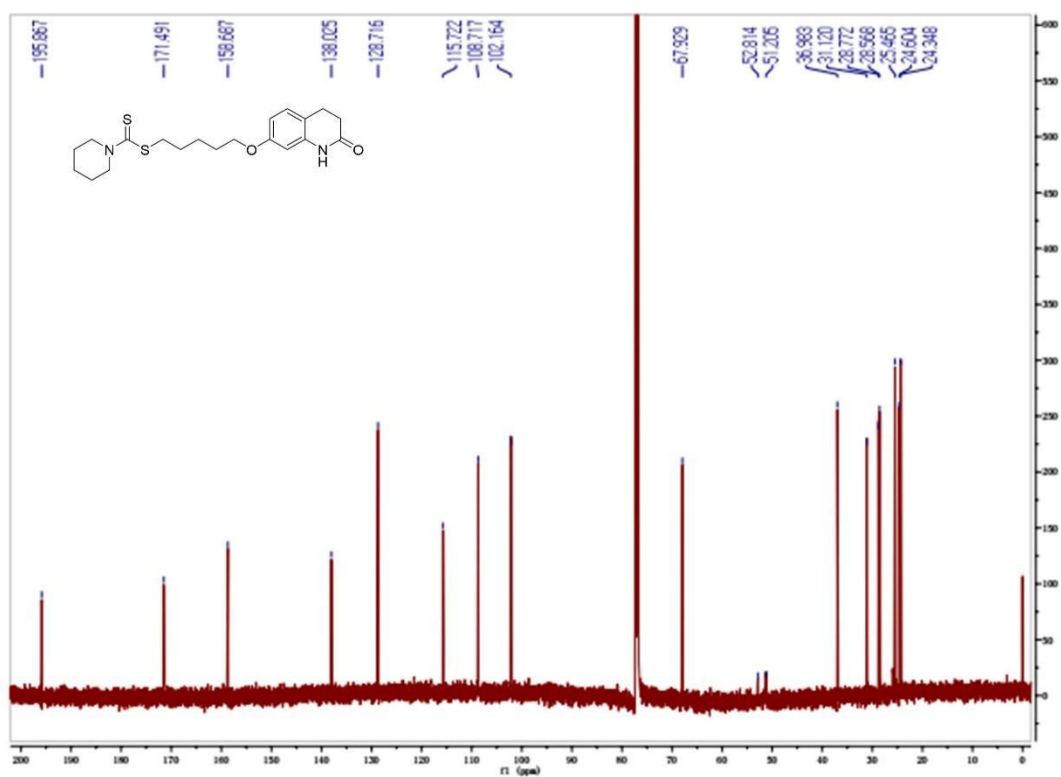

Figure S23  $^{13}\text{C}$  NMR chart of compound 3d in  $\text{CDCl}_3$ .

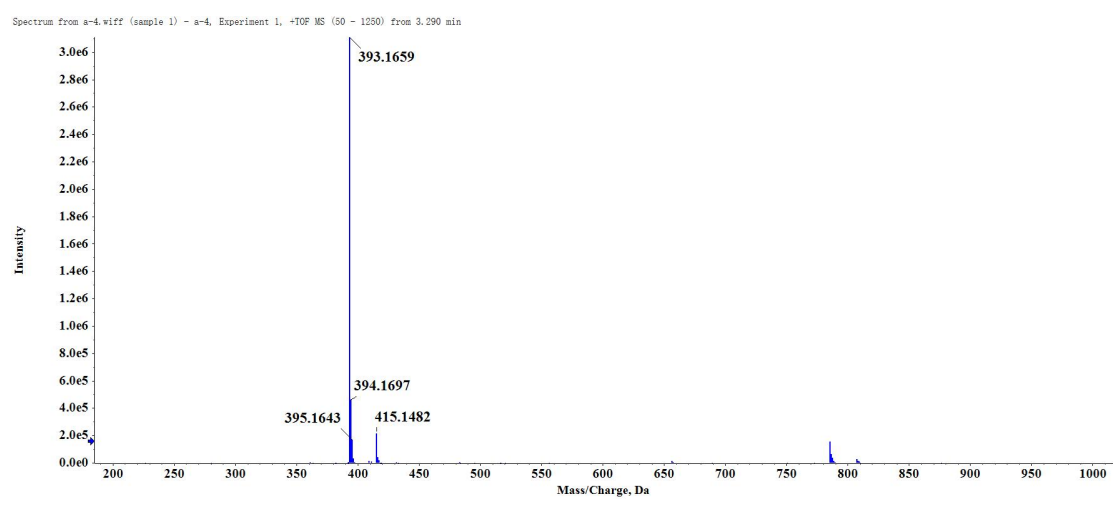

**Figure S24** HRMS (ESI) spectrum of compound **3d**.

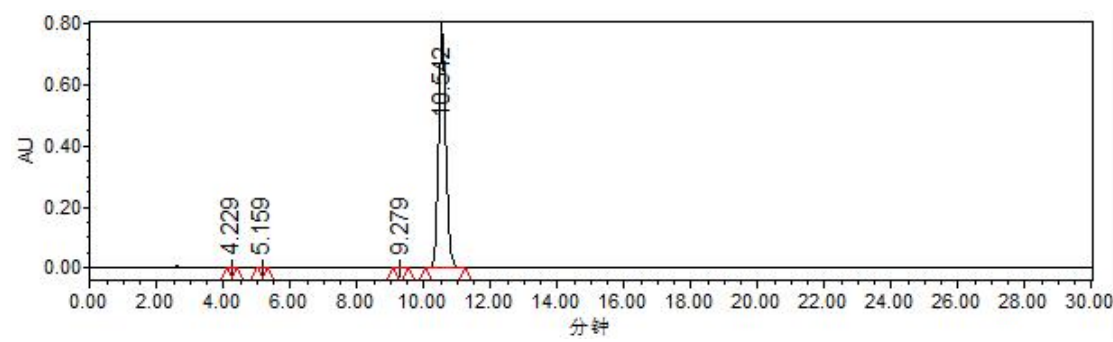

|   | Name | Retention time (min) | Area (mV*s) | %Area | Height (mV) |
|---|------|----------------------|-------------|-------|-------------|
| 1 |      | 4.229                | 5024        | 0.04  | 768         |
| 2 |      | 5.159                | 4003        | 0.03  | 442         |
| 3 |      | 9.279                | 10628       | 0.09  | 858         |
| 4 |      | 10.542               | 11851553    | 99.83 | 767427      |
|   |      |                      |             |       |             |

**Figure S25** Chromatographic report of HPLC analysis of compound **3d**.

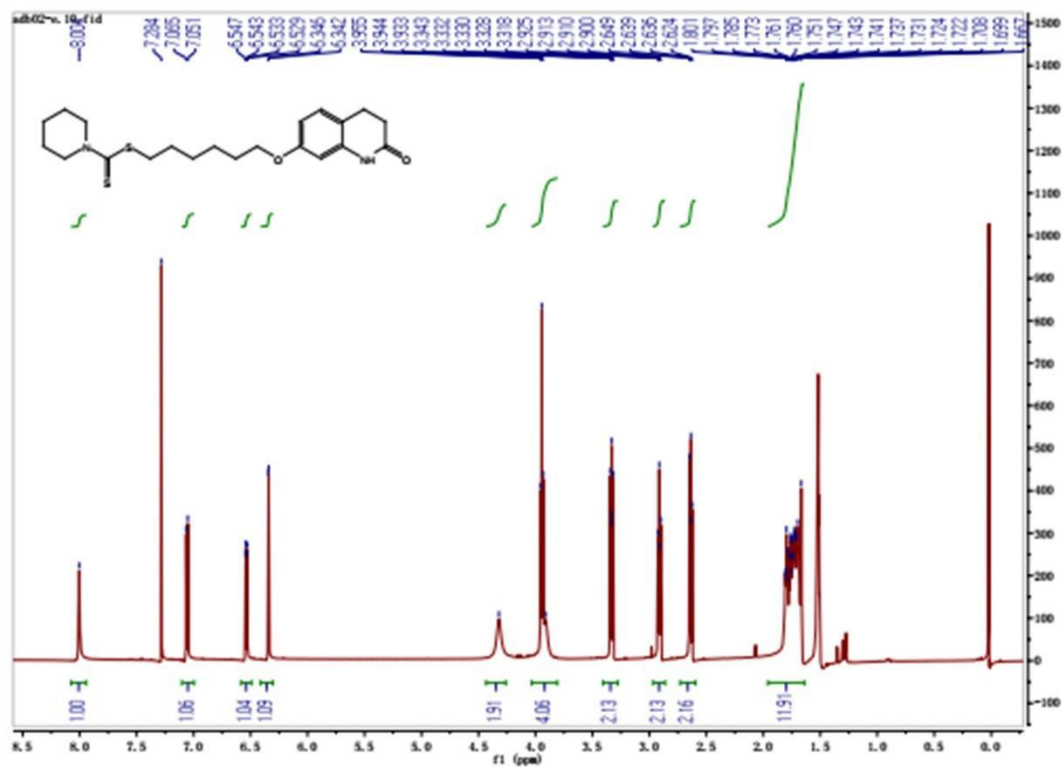

Figure S26 <sup>1</sup>H NMR chart of compound 3e in CDCl<sub>3</sub>.

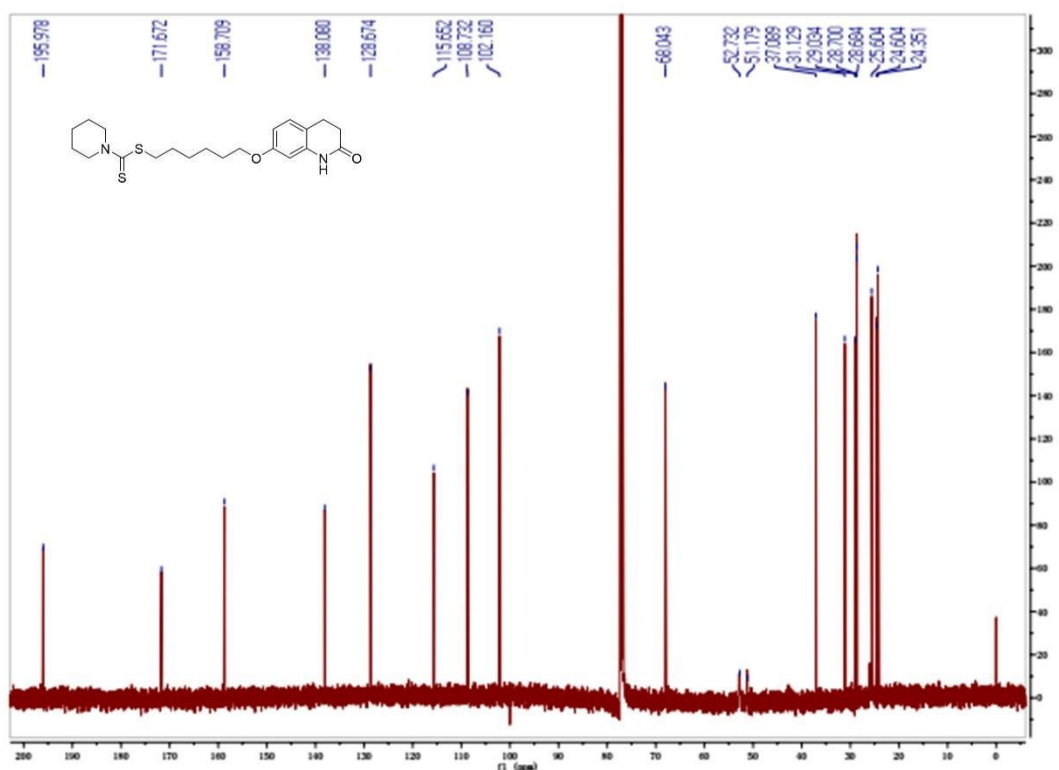

Figure S27 <sup>13</sup>C NMR chart of compound 3e in CDCl<sub>3</sub>.

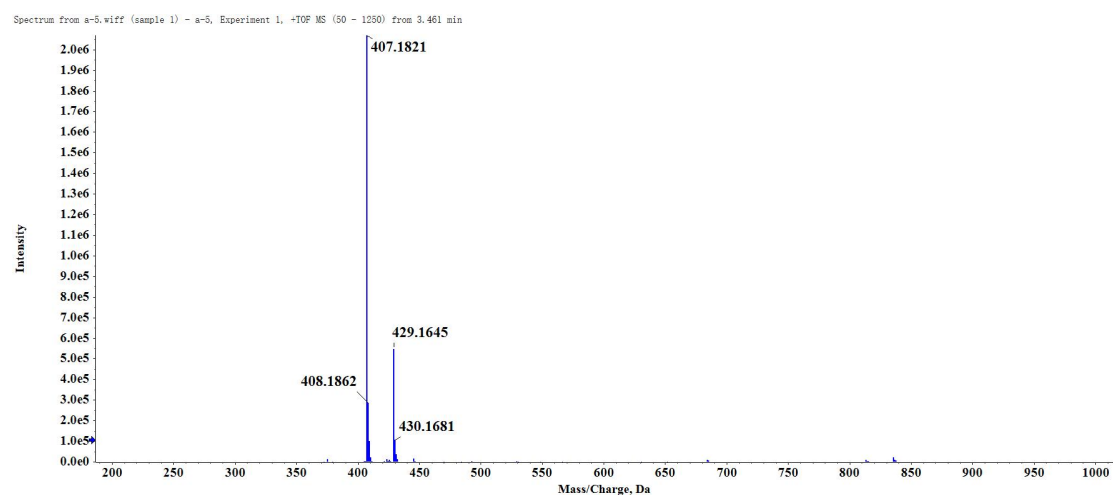

**Figure S28** HRMS (ESI) spectrum of compound **3e**.

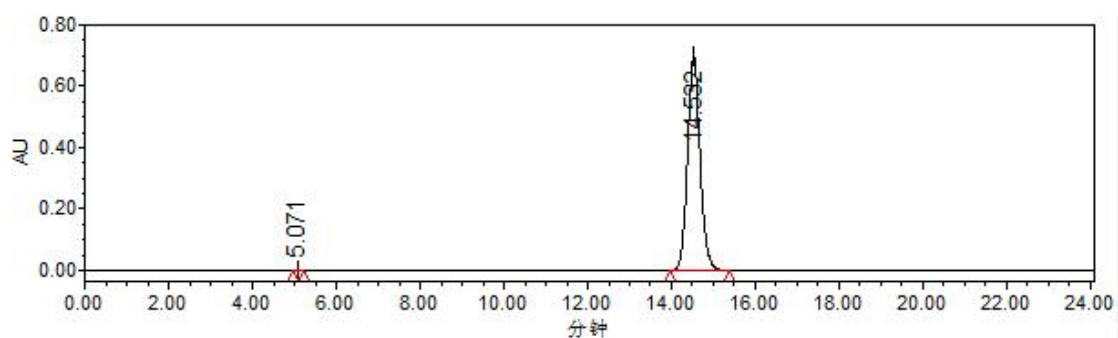

|   | Name | Retention time (min) | Area (mV*s) | %Area | Height (mV) |
|---|------|----------------------|-------------|-------|-------------|
| 1 |      | 5.071                | 2895        | 0.02  | 389         |
| 2 |      | 14.532               | 14510125    | 99.98 | 695616      |

**Figure S29** Chromatographic report of HPLC analysis of compound **3e**.

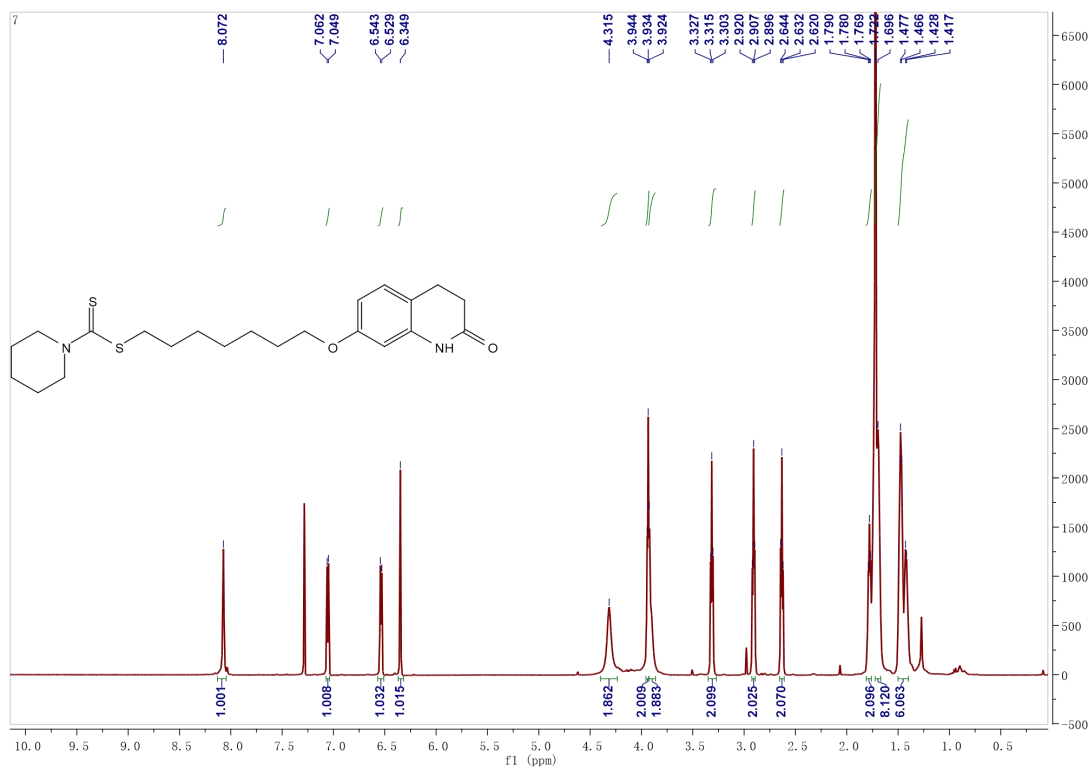

Figure S30  $^1\text{H}$  NMR chart of compound **3f** in  $\text{CDCl}_3$ .

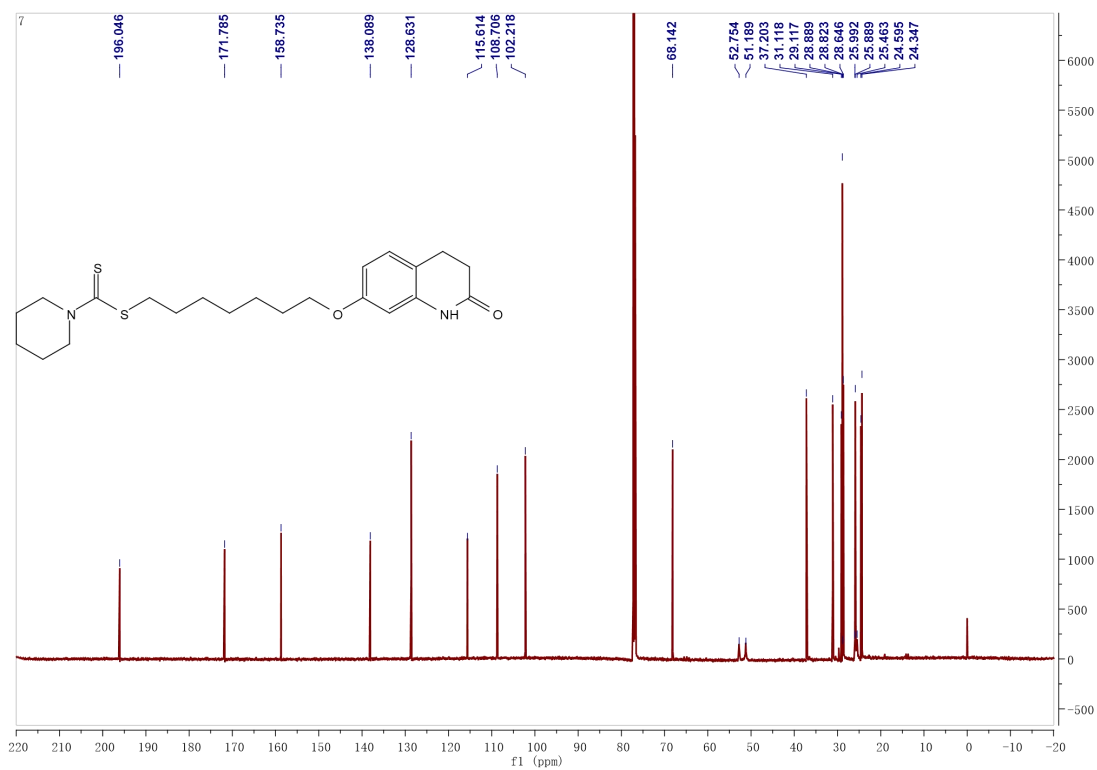

Figure S31  $^{13}\text{C}$  NMR chart of compound **3f** in  $\text{CDCl}_3$ .

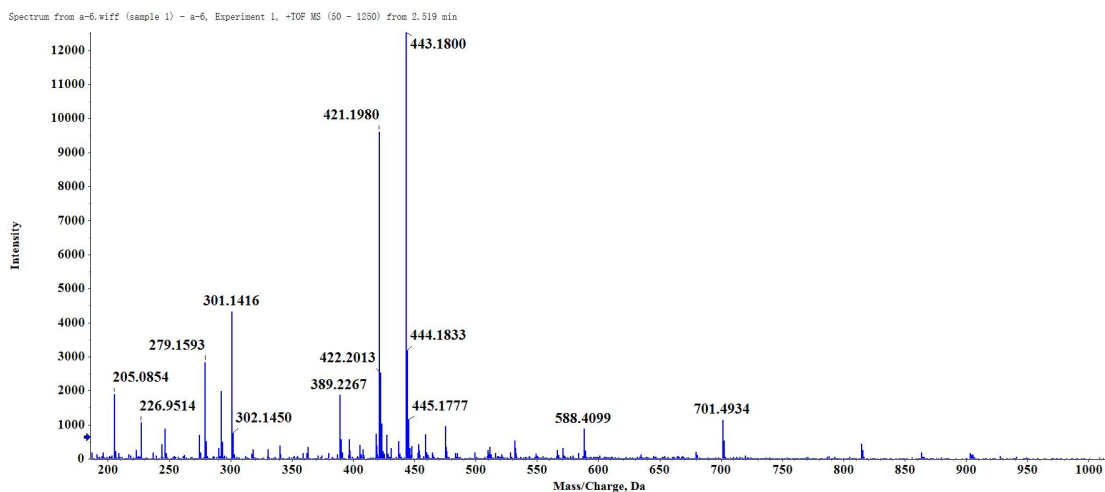

**Figure S32** HRMS (ESI) spectrum of compound **3f**.

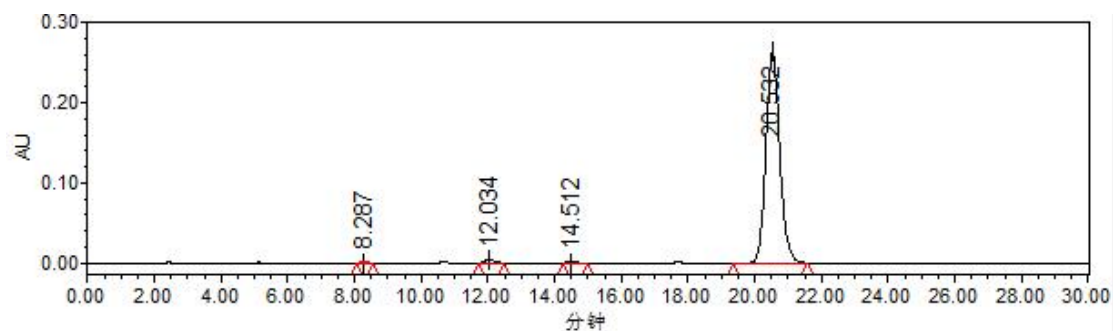

|   | Name | Retention time (min) | Area (mV*s) | %Area | Height (mV) |
|---|------|----------------------|-------------|-------|-------------|
| 1 |      | 8.287                | 15744       | 0.21  | 1270        |
| 2 |      | 12.034               | 80255       | 1.05  | 4396        |
| 3 |      | 14.512               | 12361       | 0.16  | 621         |
| 4 |      | 20.532               | 7542608     | 98.58 | 262644      |
|   |      |                      |             |       |             |

**Figure S33** Chromatographic report of HPLC analysis of compound **3f**.

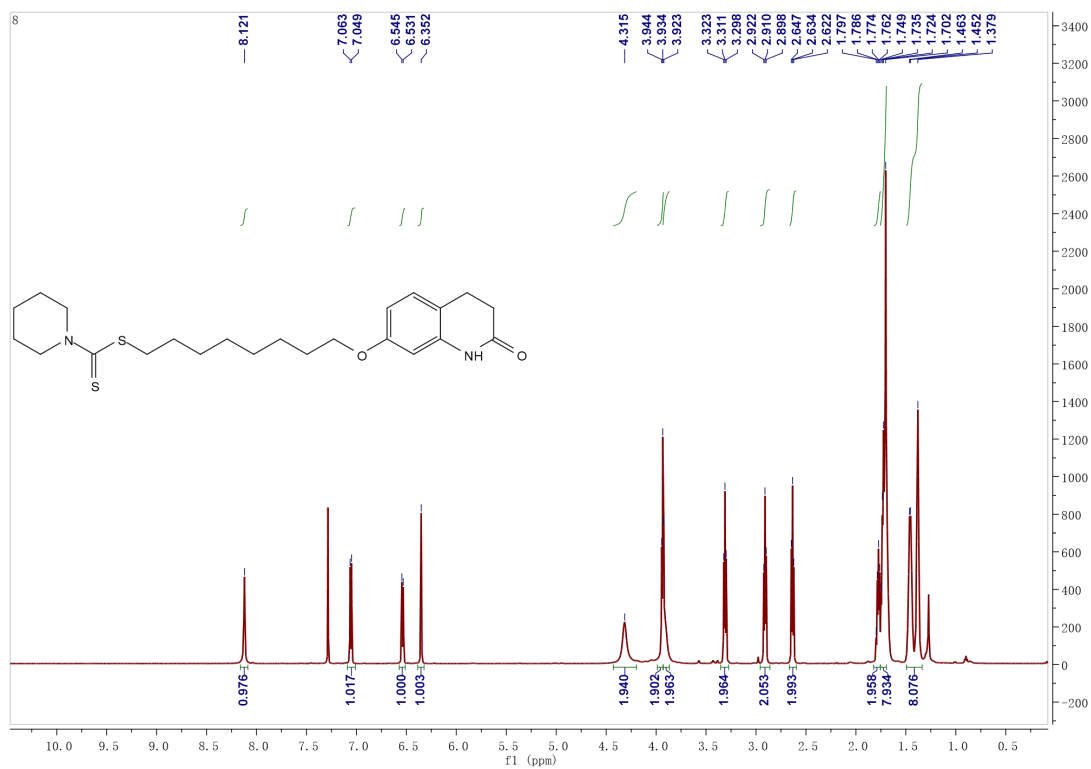

Figure S34  $^1\text{H}$  NMR chart of compound **3g** in  $\text{CDCl}_3$ .

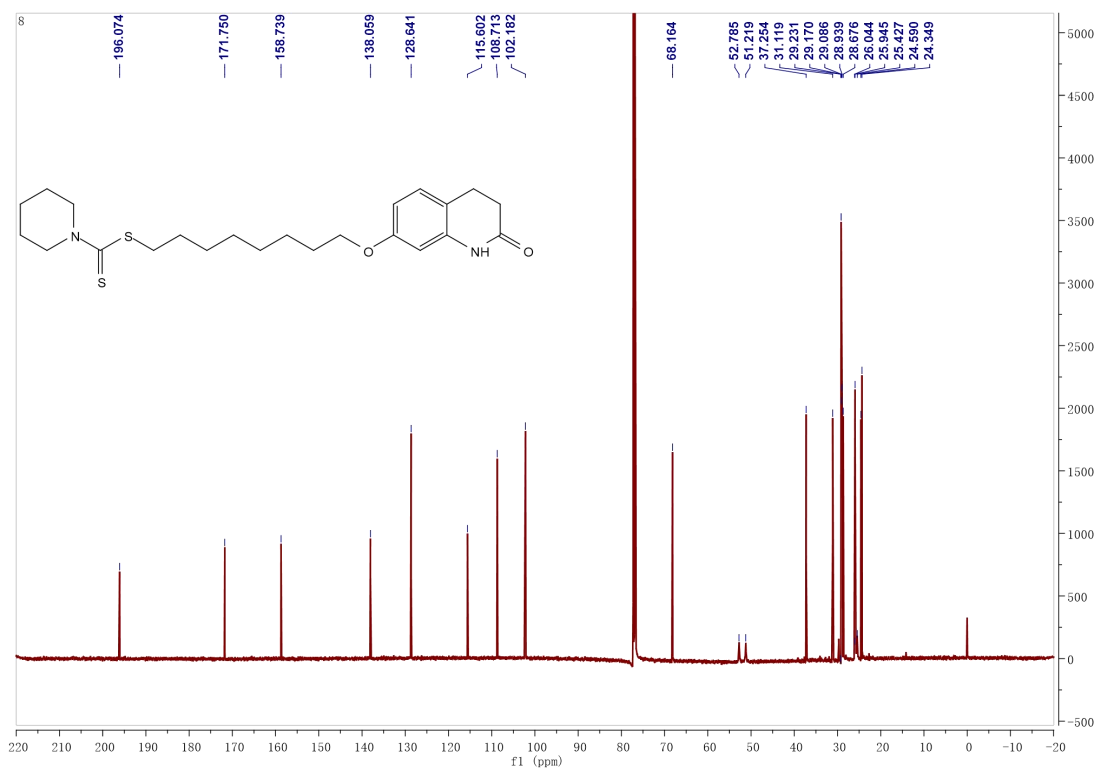

Figure S35  $^{13}\text{C}$  NMR chart of compound **3g** in  $\text{CDCl}_3$ .



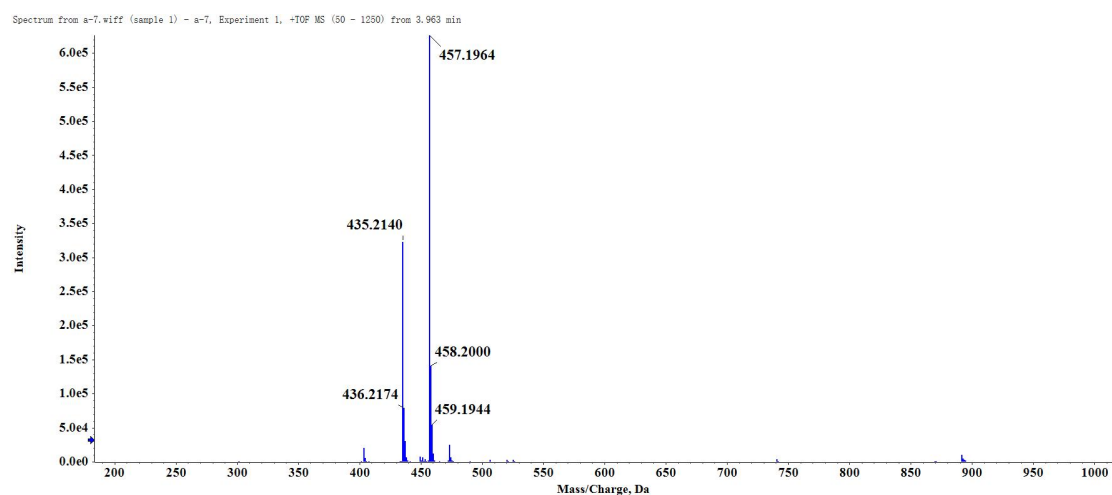

**Figure S36** HRMS (ESI) spectrum of compound **3g**.

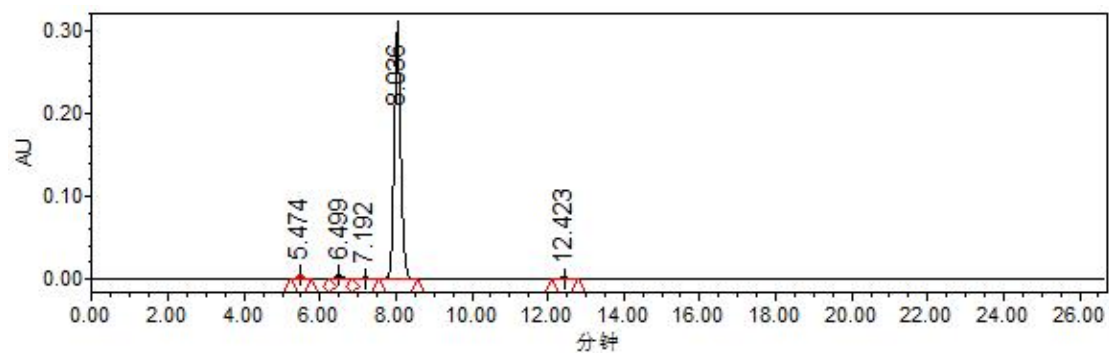

|   | Name | Retention time (min) | Area (mV*s) | %Area | Height (mV) |
|---|------|----------------------|-------------|-------|-------------|
| 1 |      | 5.474                | 49633       | 1.33  | 5876        |
| 2 |      | 6.499                | 66960       | 1.79  | 6959        |
| 3 |      | 7.192                | 24379       | 0.65  | 2255        |
| 4 |      | 8.036                | 355581      | 95.24 | 298971      |
| 5 |      | 12.423               | 36546       | 0.98  | 1815        |
|   |      |                      |             |       |             |

**Figure S37** Chromatographic report of HPLC analysis of compound **3g**.

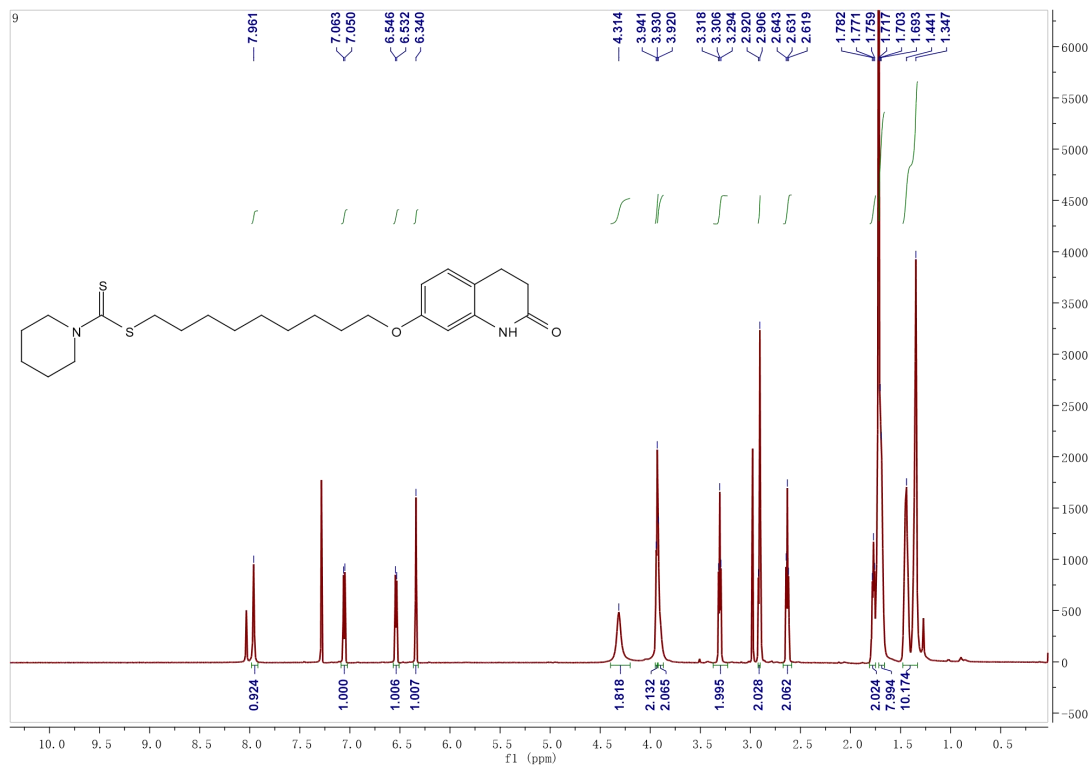

Figure S38  $^1\text{H}$  NMR chart of compound 3h in  $\text{CDCl}_3$ .

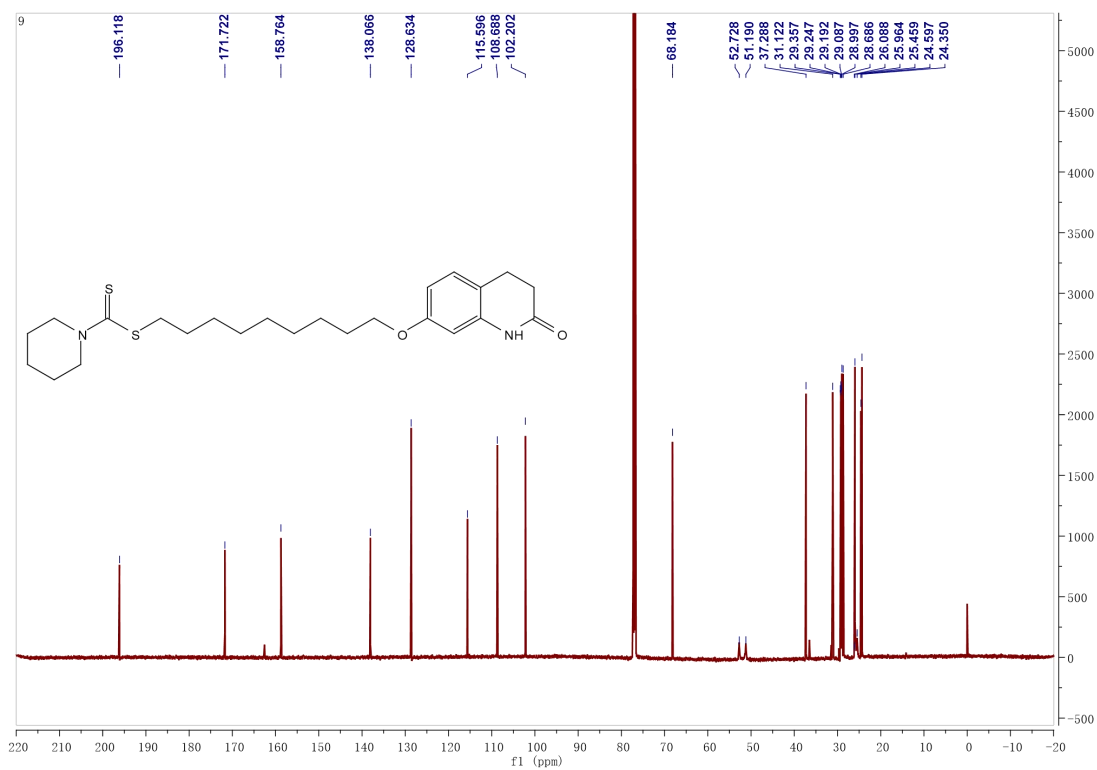

Figure S39  $^{13}\text{C}$  NMR chart of compound 3h in  $\text{CDCl}_3$ .

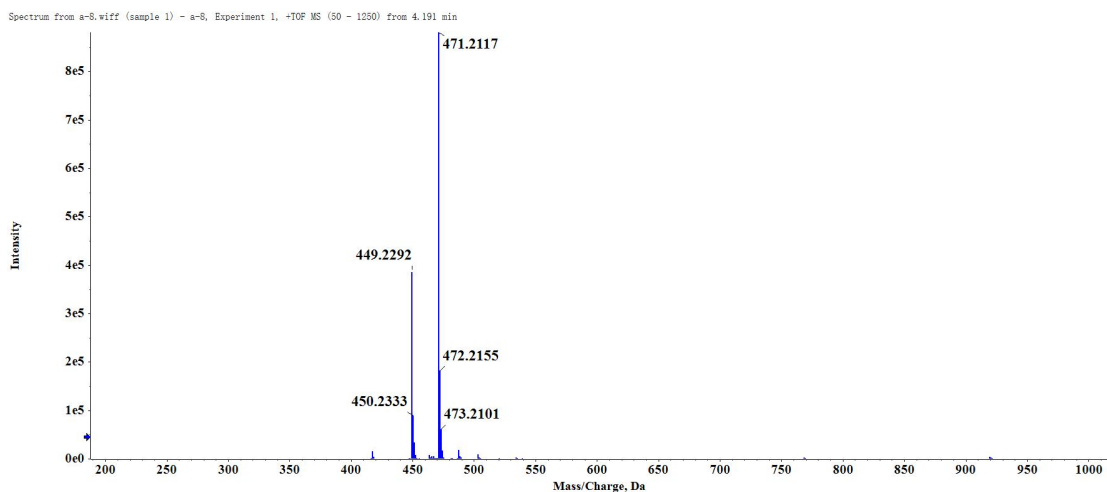

**Figure S40** HRMS (ESI) spectrum of compound **3h**.

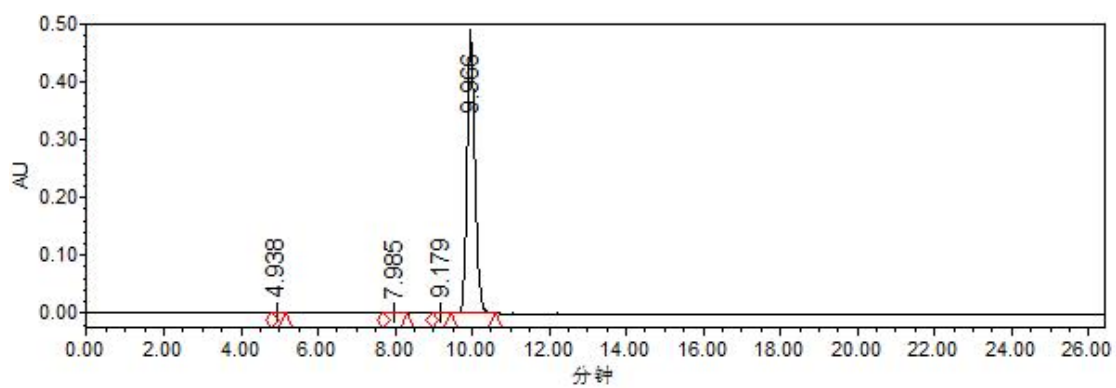

|   | Name | Retention time (min) | Area (mV*s) | %Area | Height (mV) |
|---|------|----------------------|-------------|-------|-------------|
| 1 |      | 4.938                | 18132       | 0.26  | 2284        |
| 2 |      | 7.985                | 39952       | 0.58  | 2122        |
| 3 |      | 9.179                | 39506       | 0.57  | 2969        |
| 4 |      | 9.966                | 6801256     | 98.59 | 472104      |
|   |      |                      |             |       |             |

**Figure S41** Chromatographic report of HPLC analysis of compound **3h**.

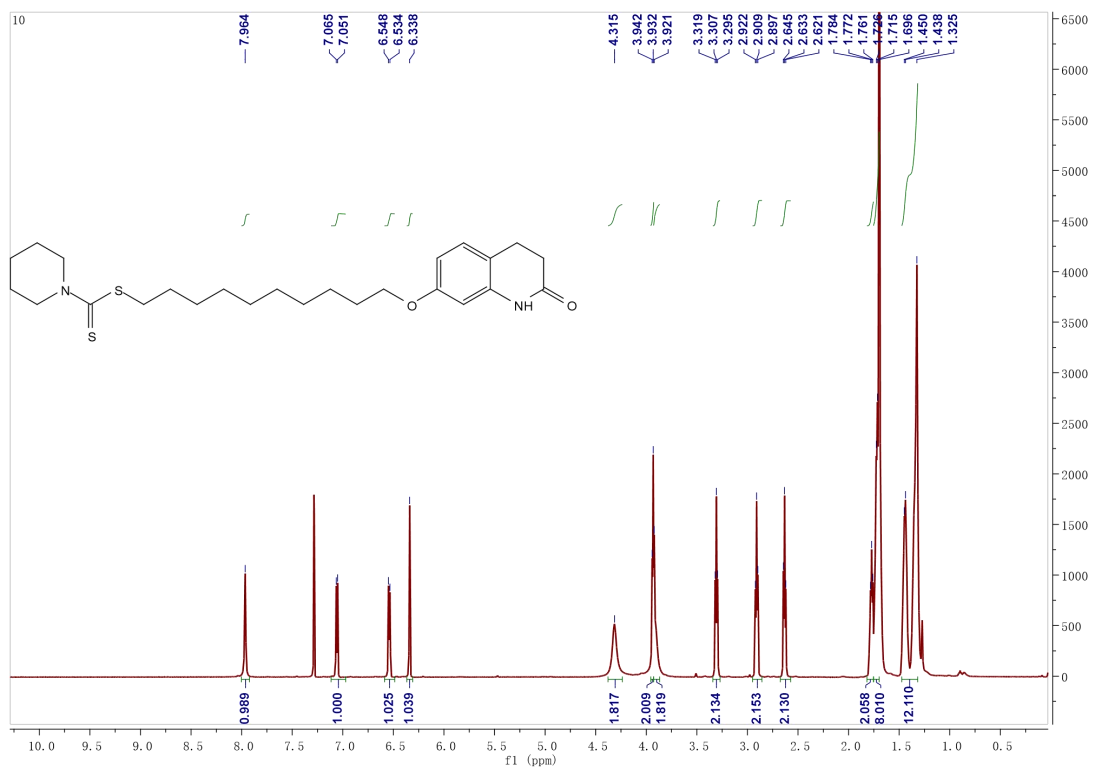

Figure S42 <sup>1</sup>H NMR chart of compound 3i in CDCl<sub>3</sub>.

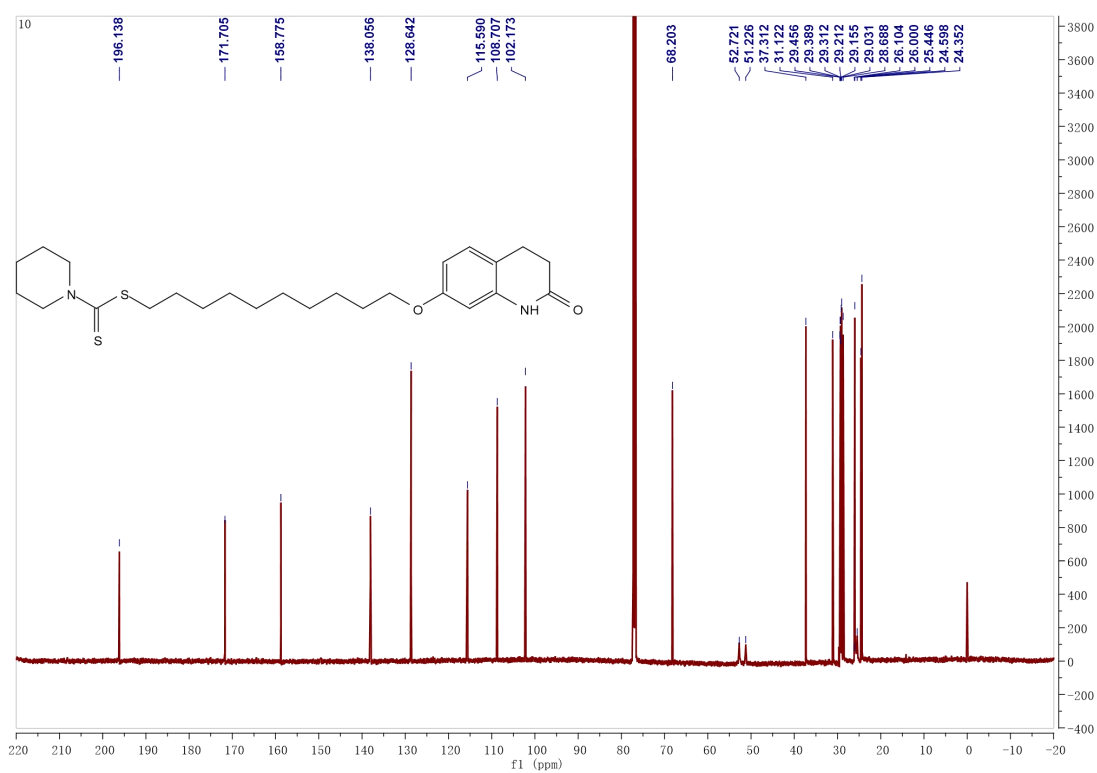

Figure S43 <sup>13</sup>C NMR chart of compound 3i in CDCl<sub>3</sub>.

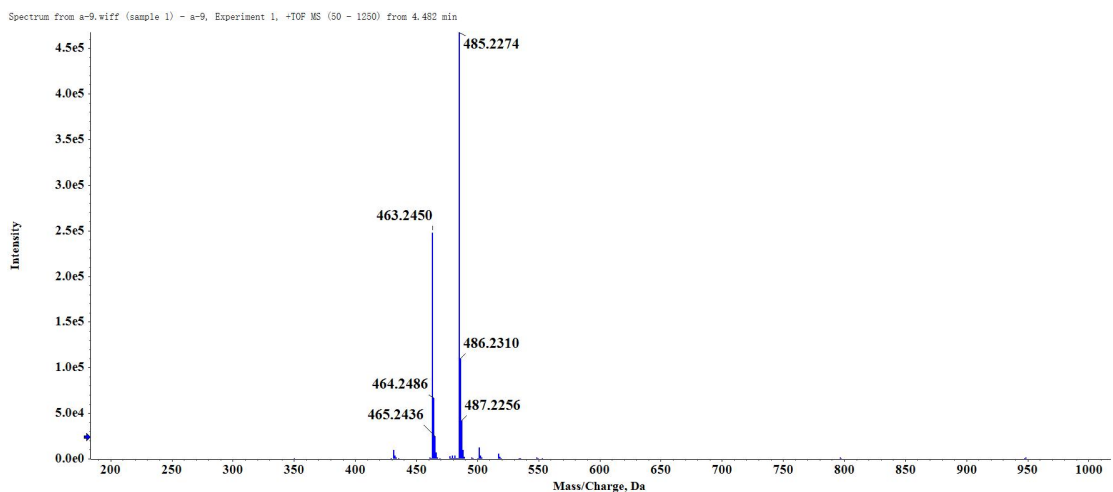

**Figure S44** HRMS (ESI) spectrum of compound **3i**.

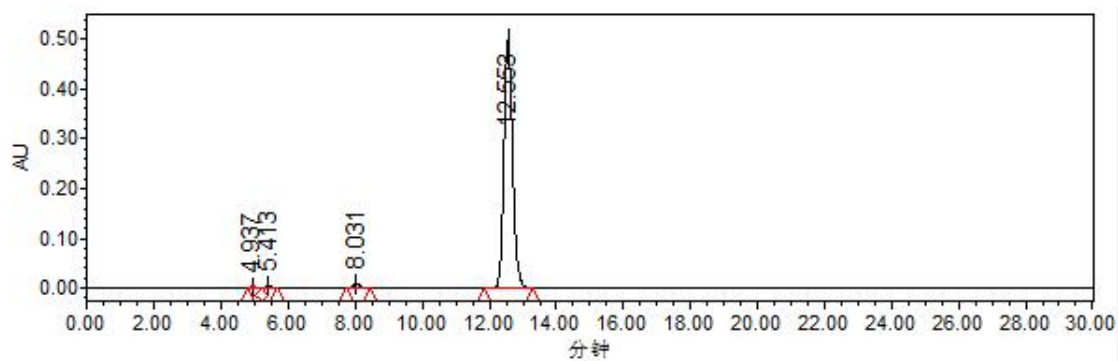

**Figure S45** Chromatographic report of HPLC analysis of compound **3i**.

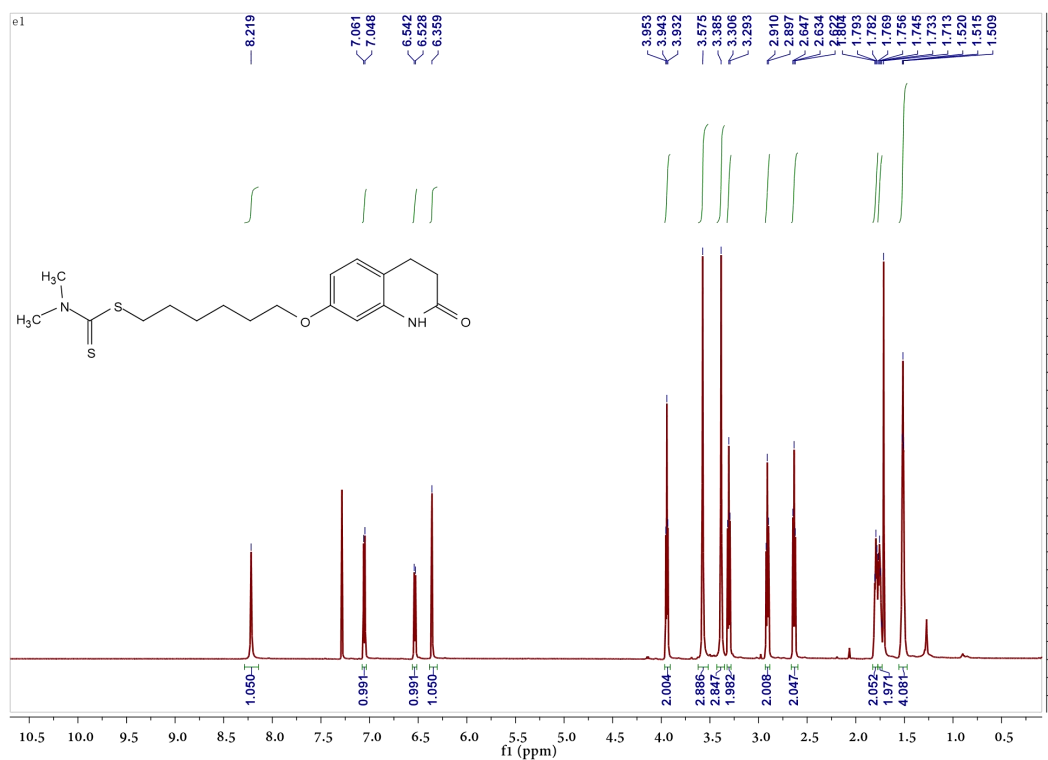

Figure S46  $^1\text{H}$  NMR chart of compound **3e1** in  $\text{CDCl}_3$ .

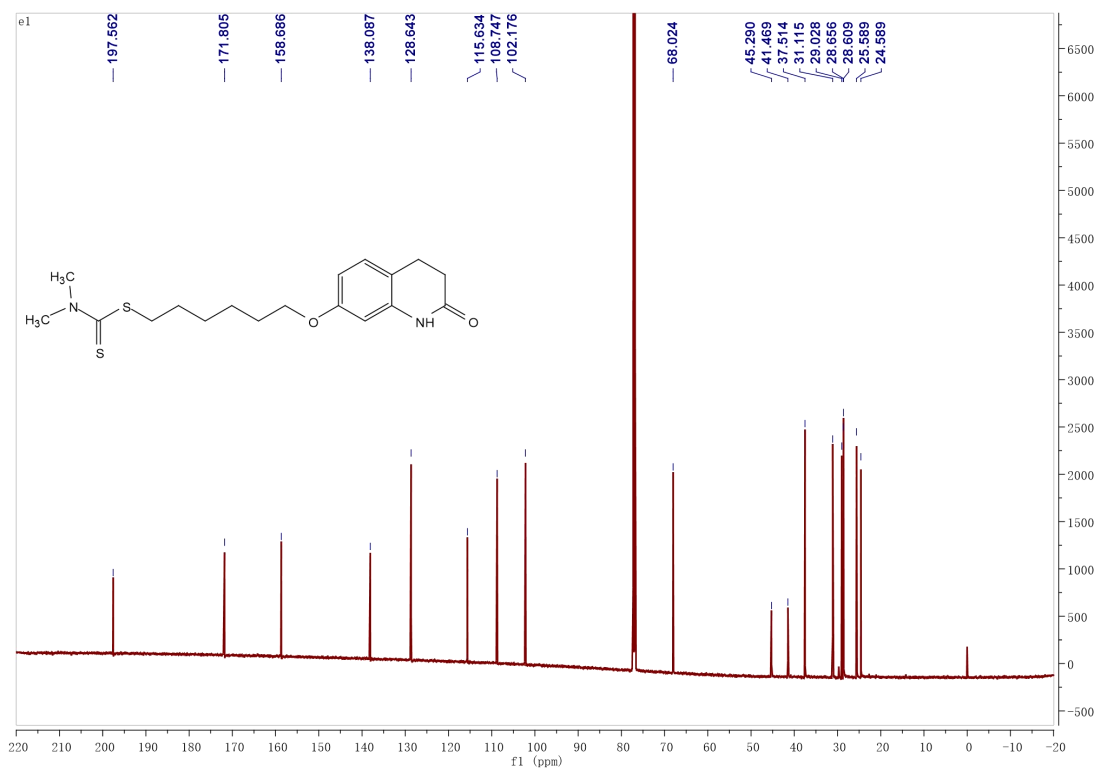

Figure S47  $^{13}\text{C}$  NMR chart of compound **3e1** in  $\text{CDCl}_3$ .

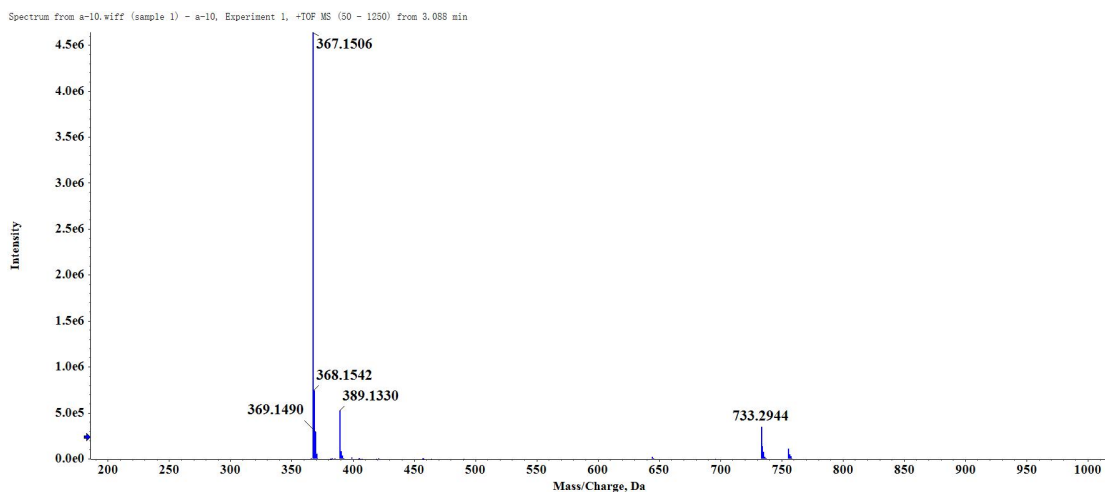

**Figure S48** HRMS (ESI) spectrum of compound **3e<sub>1</sub>**.

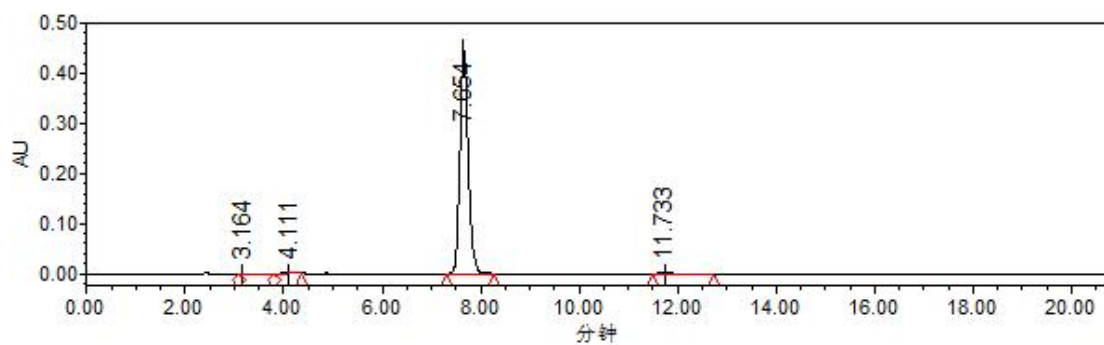

|   | Name | Retention time (min) | Area (mV*s) | %Area | Height (mV) |
|---|------|----------------------|-------------|-------|-------------|
| 1 |      | 3.164                | 10986       | 0.21  | 642         |
| 2 |      | 4.111                | 20265       | 0.38  | 1377        |
| 3 |      | 7.654                | 5285531     | 99.16 | 447421      |
| 4 |      | 11.733               | 13509       | 0.25  | 598         |
|   |      |                      |             |       |             |

**Figure S49** Chromatographic report of HPLC analysis of compound **3e<sub>1</sub>**.

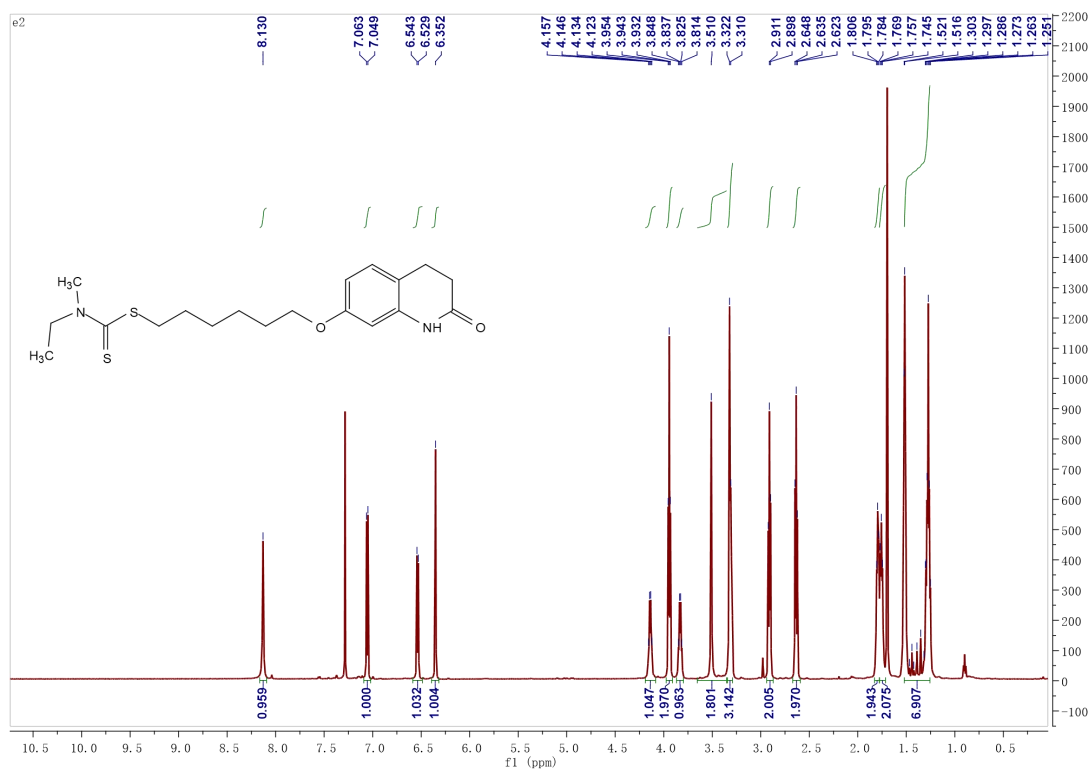

Figure S50  $^1\text{H}$  NMR chart of compound **3e2** in  $\text{CDCl}_3$ .

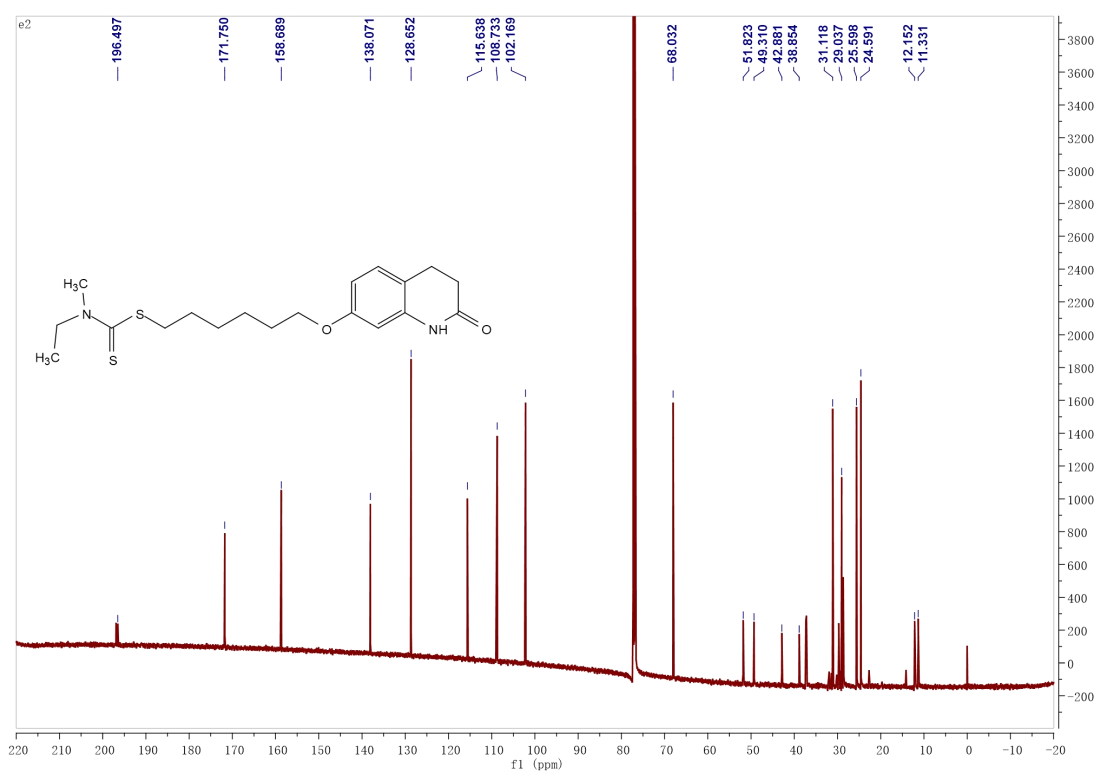

Figure S51  $^{13}\text{C}$  NMR chart of compound **3e2** in  $\text{CDCl}_3$ .



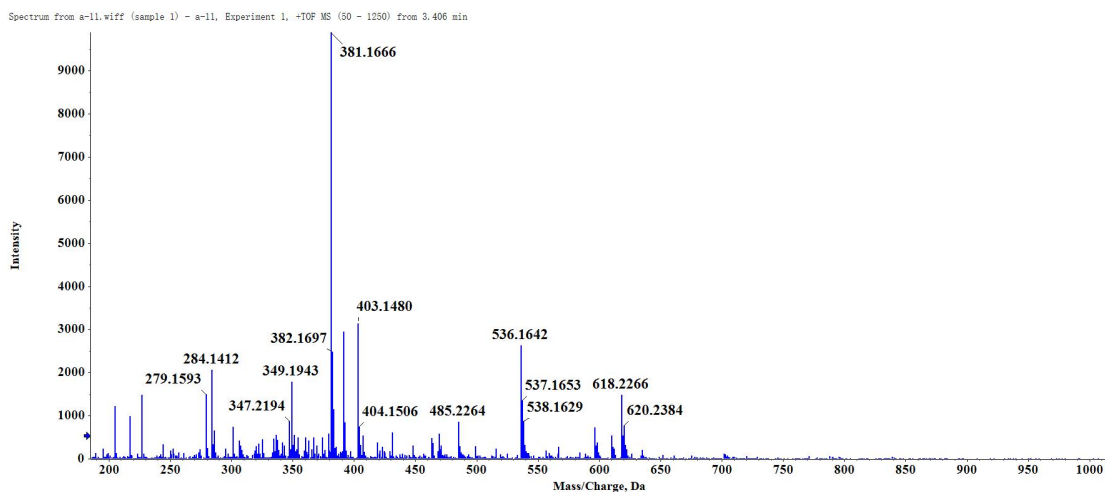

Figure S52 HRMS (ESI) spectrum of compound **3e<sub>2</sub>**.

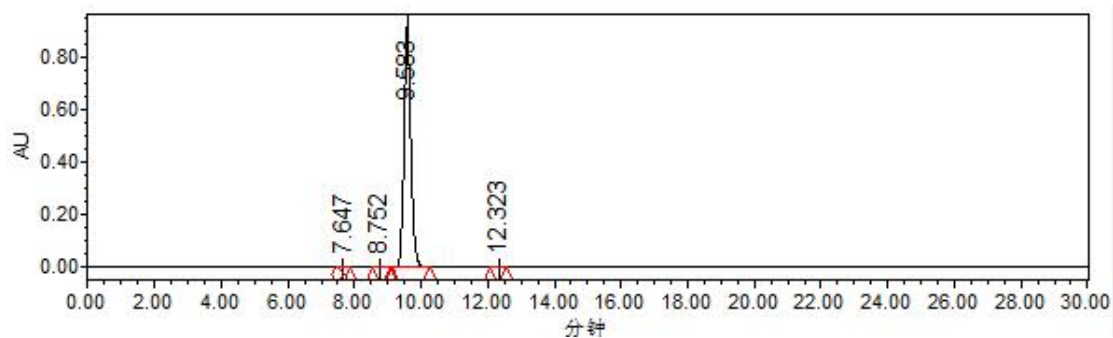

|   | Name | Retention time (min) | Area (mV*s) | %Area | Height (mV) |
|---|------|----------------------|-------------|-------|-------------|
| 1 |      | 7.647                | 12501       | 0.09  | 1073        |
| 2 |      | 8.752                | 7755        | 0.06  | 521         |
| 3 |      | 9.583                | 13161985    | 99.77 | 917522      |
| 4 |      | 12.323               | 9899        | 0.08  | 671         |
|   |      |                      |             |       |             |

Figure S53 Chromatographic report of HPLC analysis of compound **3e<sub>2</sub>**.

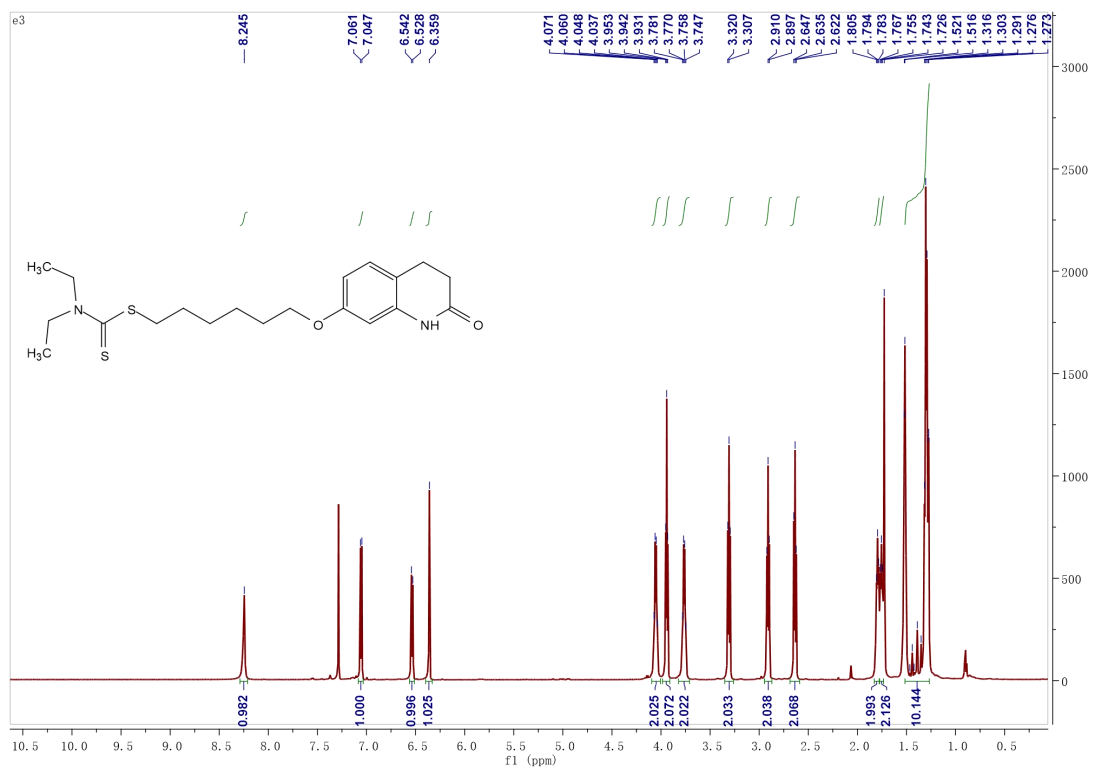

Figure S54  $^1\text{H}$  NMR chart of compound **3e3** in  $\text{CDCl}_3$ .

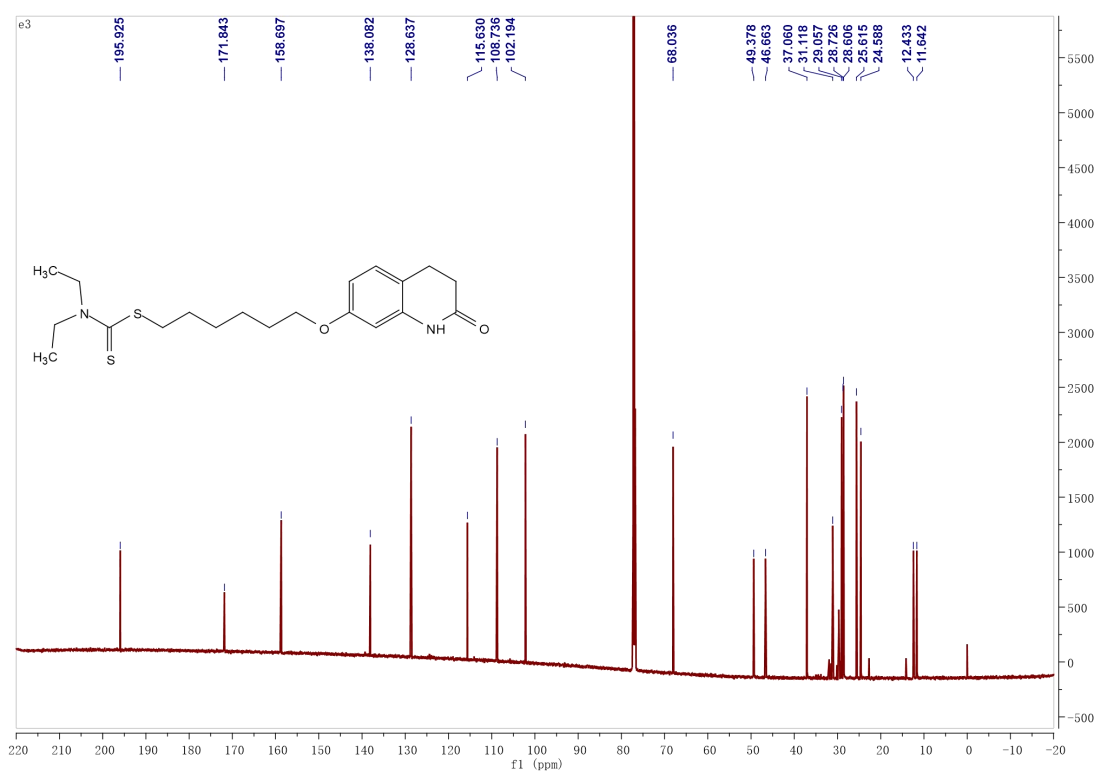

Figure S55  $^{13}\text{C}$  NMR chart of compound **3e3** in  $\text{CDCl}_3$ .

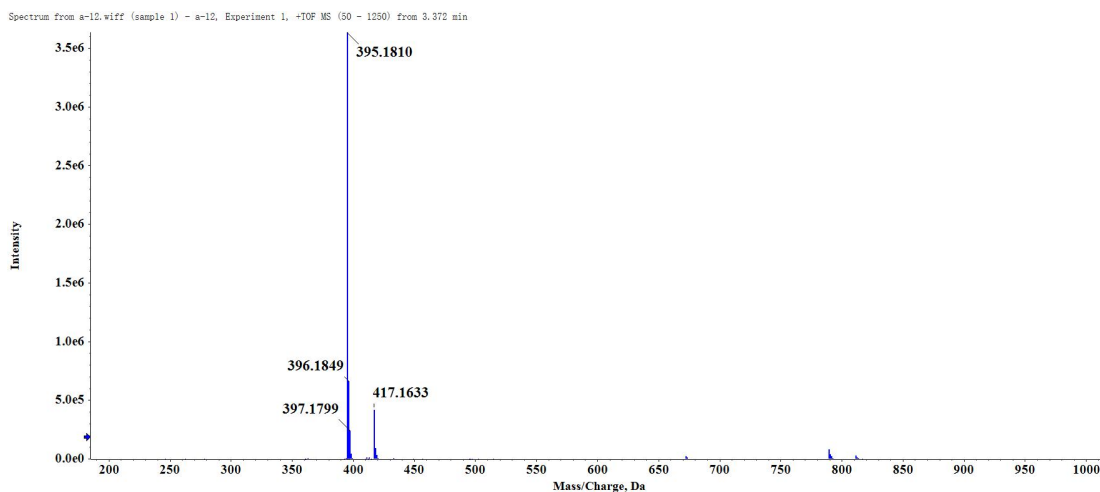

**Figure S56** HRMS (ESI) spectrum of compound **3e<sub>3</sub>**.

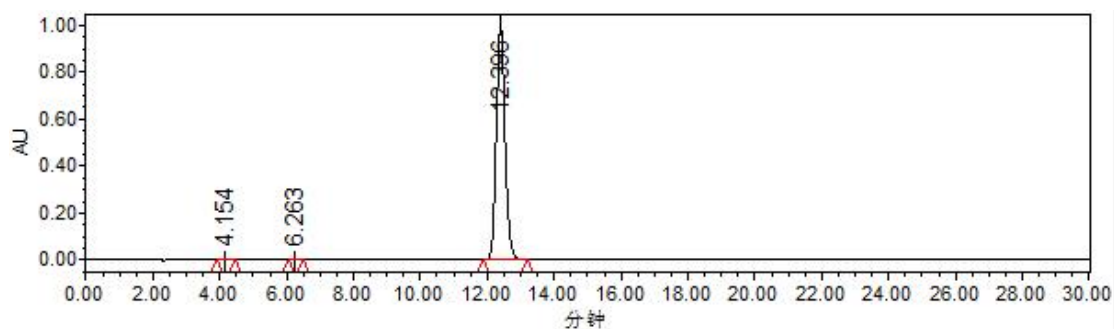

|   | Name | Retention time (min) | Area (mV*s) | %Area | Height (mV) |
|---|------|----------------------|-------------|-------|-------------|
| 1 |      | 4.154                | 4576        | 0.03  | 288         |
| 2 |      | 6.263                | 10048       | 0.06  | 956         |
| 3 |      | 12.396               | 17993692    | 99.92 | 995282      |

**Figure S57** Chromatographic report of HPLC analysis of compound **3e<sub>3</sub>**.

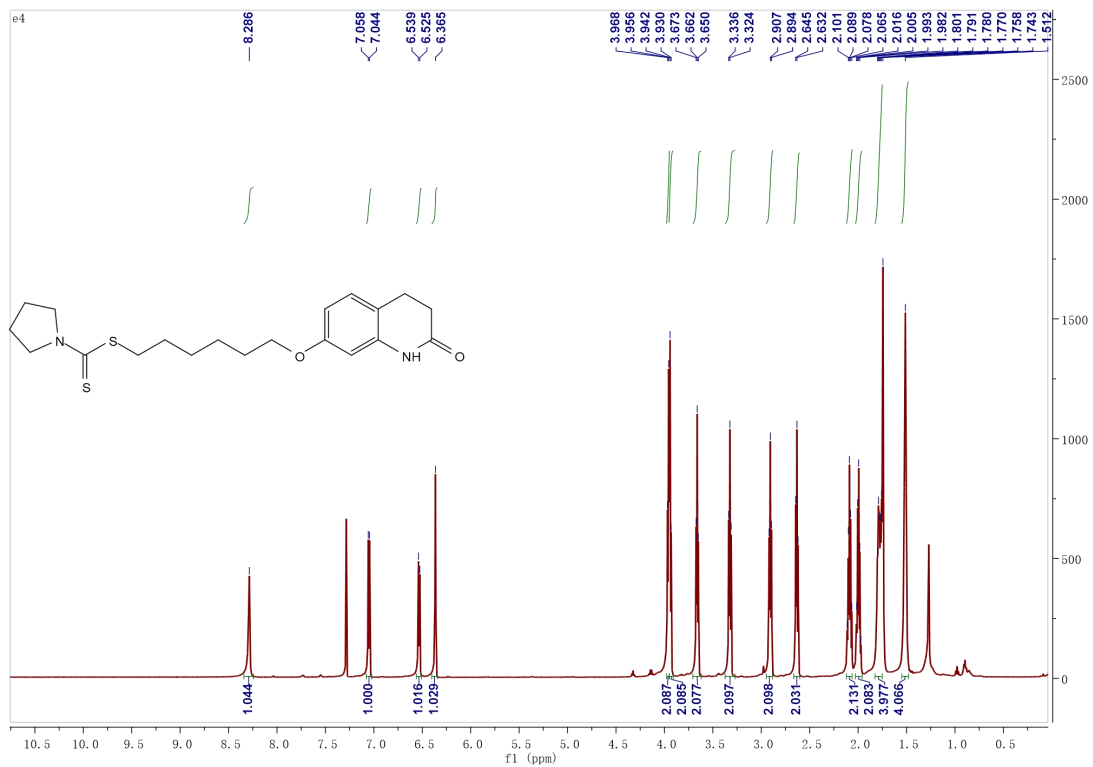

Figure S58 <sup>1</sup>H NMR chart of compound **3e4** in CDCl<sub>3</sub>.

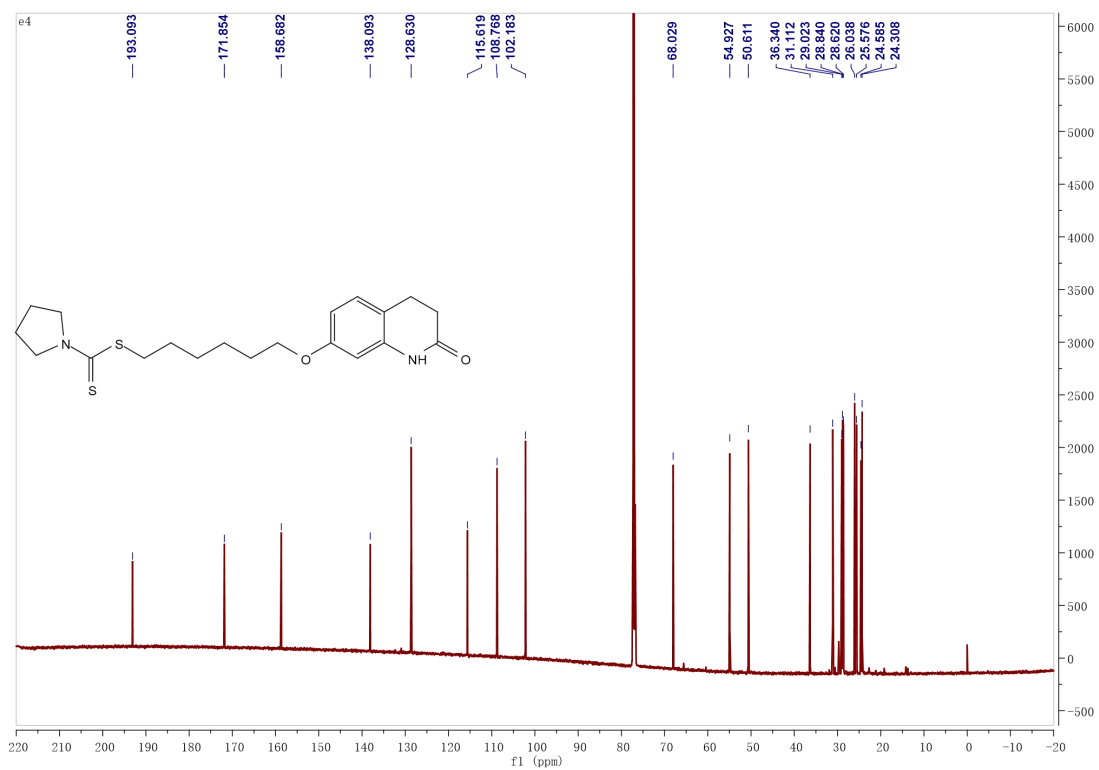

Figure S59 <sup>13</sup>C NMR chart of compound **3e4** in CDCl<sub>3</sub>.

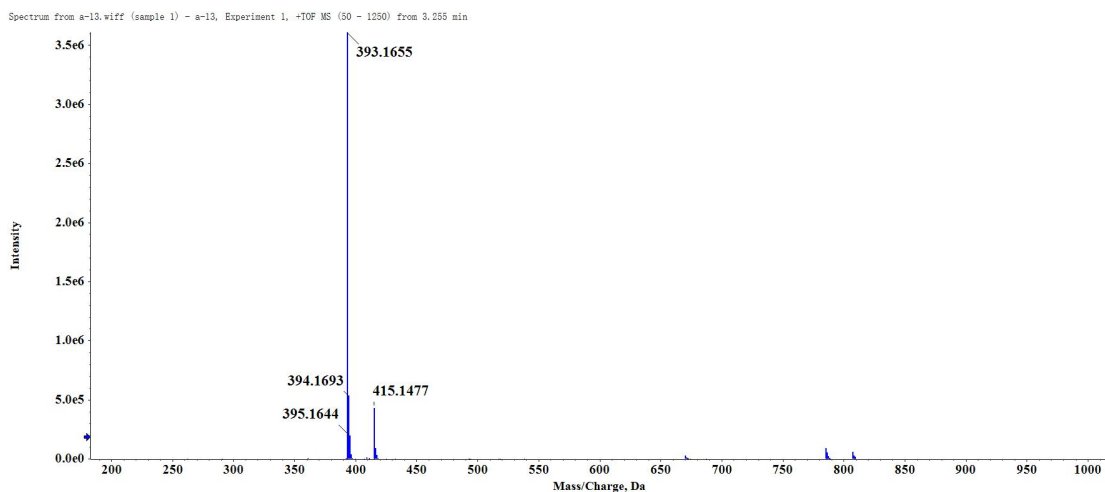

**Figure S60** HRMS (ESI) spectrum of compound **3e4**.

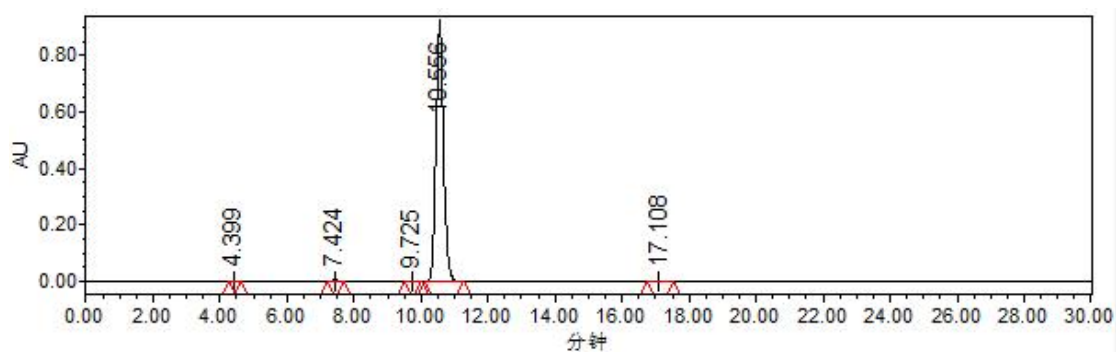

|   | Name | Retention time | Area (mV*s) | %Area | Height (mV) |
|---|------|----------------|-------------|-------|-------------|
| 1 |      | 4.399          | 17320       | 0.12  | 2604        |
| 2 |      | 7.424          | 38792       | 0.28  | 3766        |
| 3 |      | 9.725          | 11624       | 0.08  | 851         |
| 4 |      | 10.556         | 13963859    | 99.19 | 892792      |
| 5 |      | 17.108         | 46236       | 0.33  | 1992        |

**Figure S61** Chromatographic report of HPLC analysis of compound **3e4**.

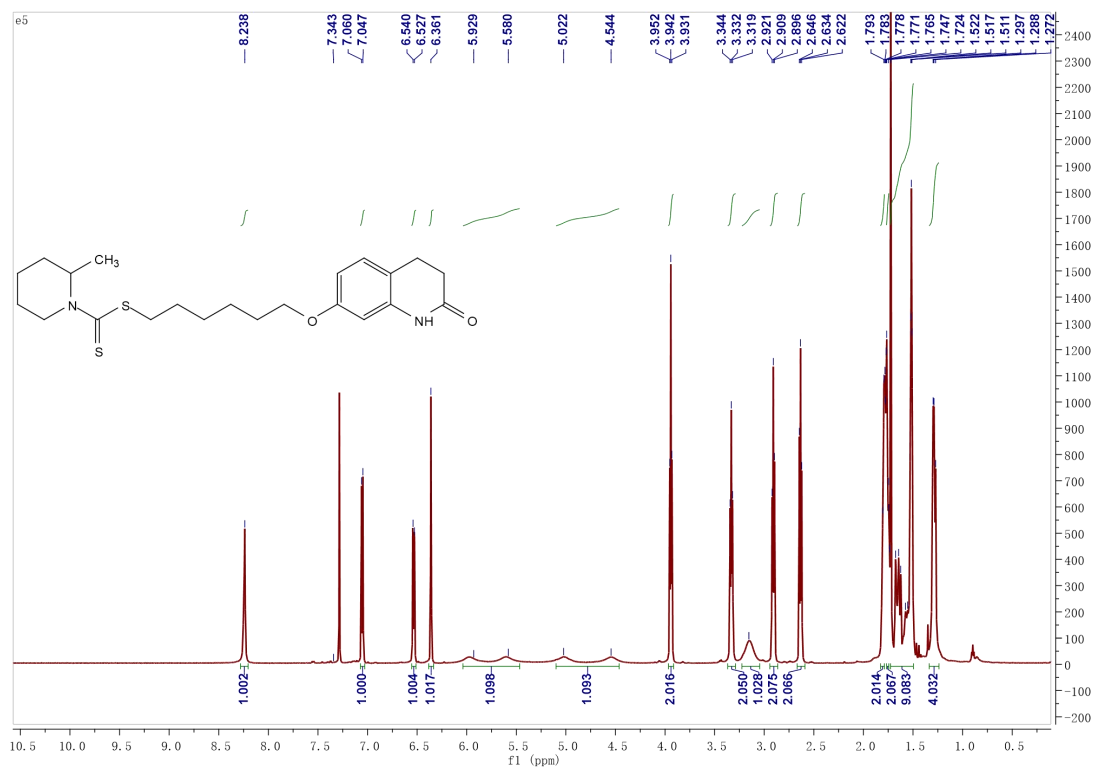

Figure S62  $^1\text{H}$  NMR chart of compound **3e5** in  $\text{CDCl}_3$ .

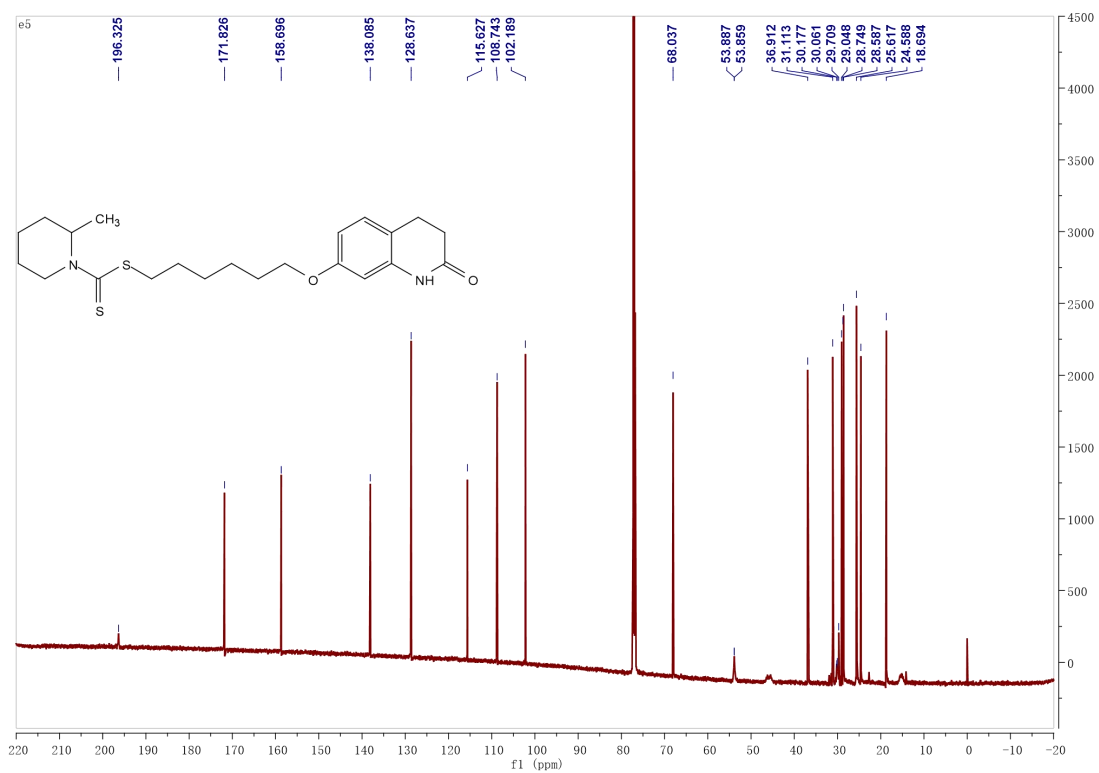

Figure S63  $^{13}\text{C}$  NMR chart of compound **3e5** in  $\text{CDCl}_3$ .

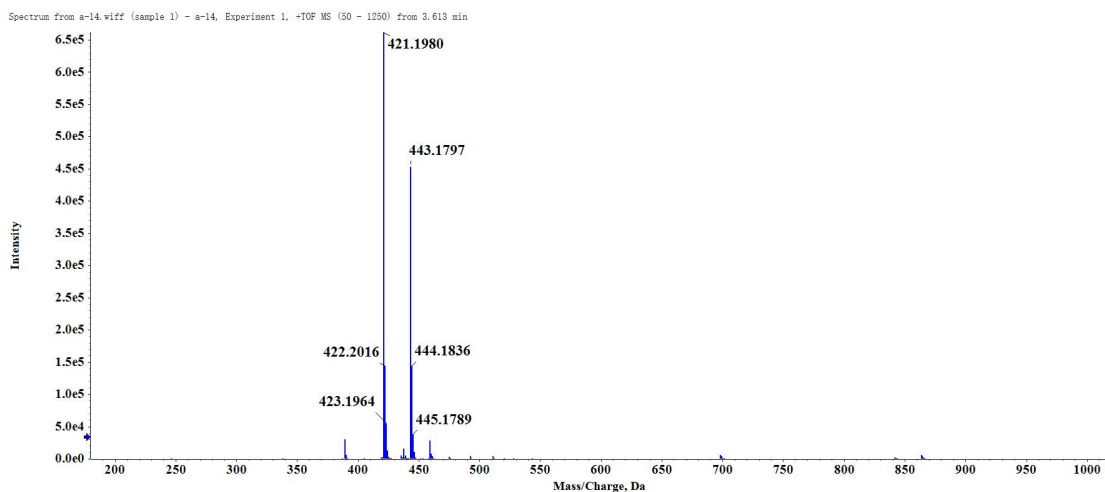

**Figure S64** HRMS (ESI) spectrum of compound **3e<sub>5</sub>**.

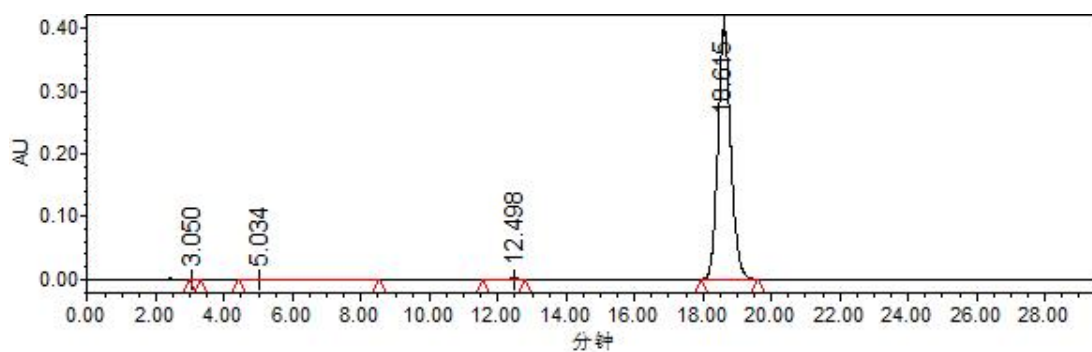

|   | Name | Retention time | Area (mV*s) | %Area | Height (mV) |
|---|------|----------------|-------------|-------|-------------|
| 1 |      | 3.05           | 2354        | 0.02  | 279         |
| 2 |      | 5.034          | 17078       | 0.16  | 363         |
| 3 |      | 12.498         | 27969       | 0.26  | 1243        |
| 4 |      | 18.615         | 10614143    | 99.56 | 401167      |

**Figure S65** Chromatographic report of HPLC analysis of compound **3e<sub>5</sub>**.

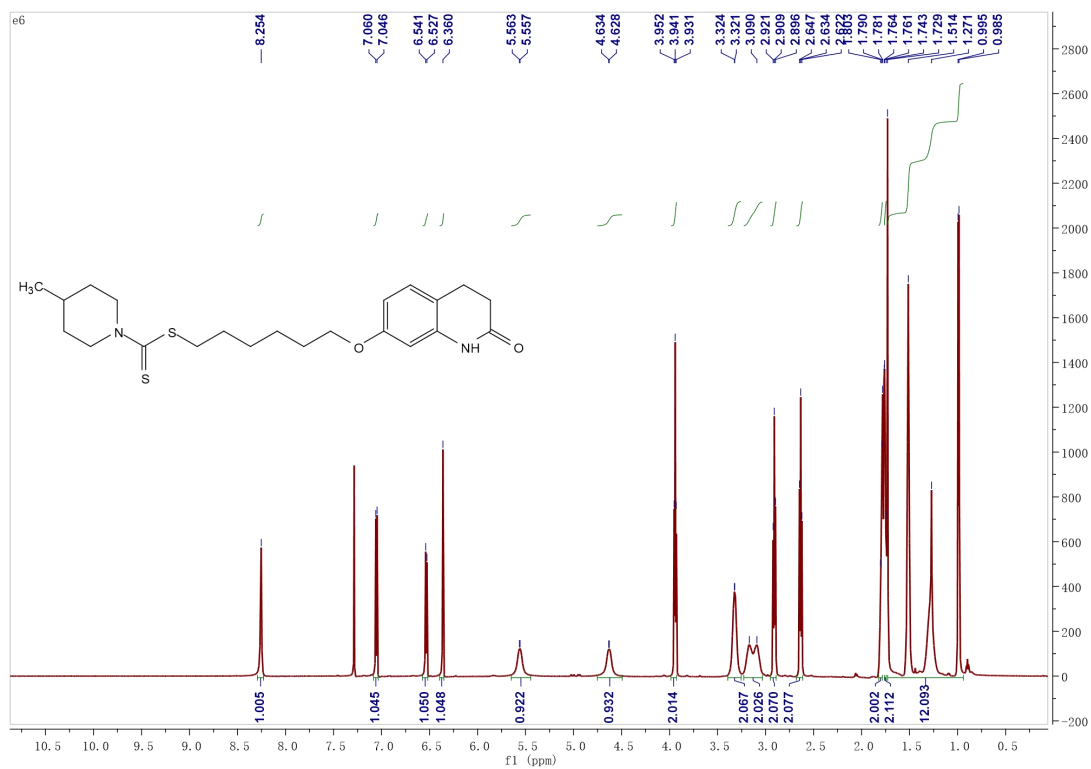

Figure S66  $^1\text{H}$  NMR chart of compound **3e6** in  $\text{CDCl}_3$ .

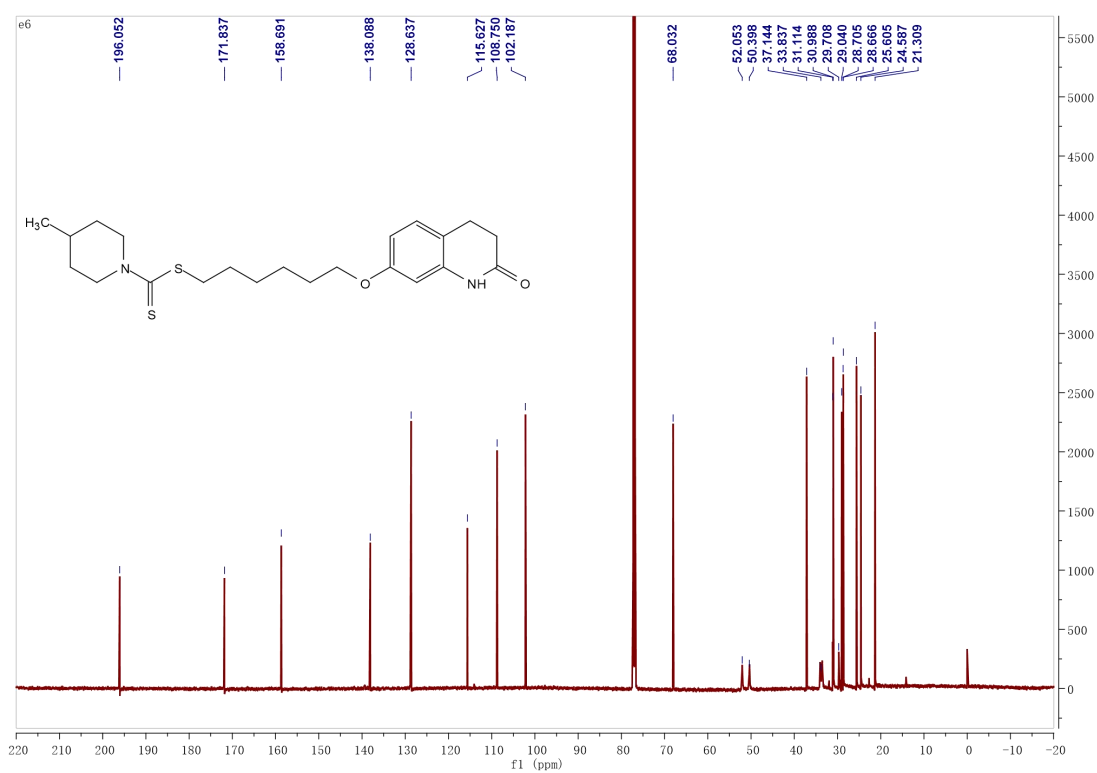

Figure S67  $^{13}\text{C}$  NMR chart of compound **3e6** in  $\text{CDCl}_3$ .



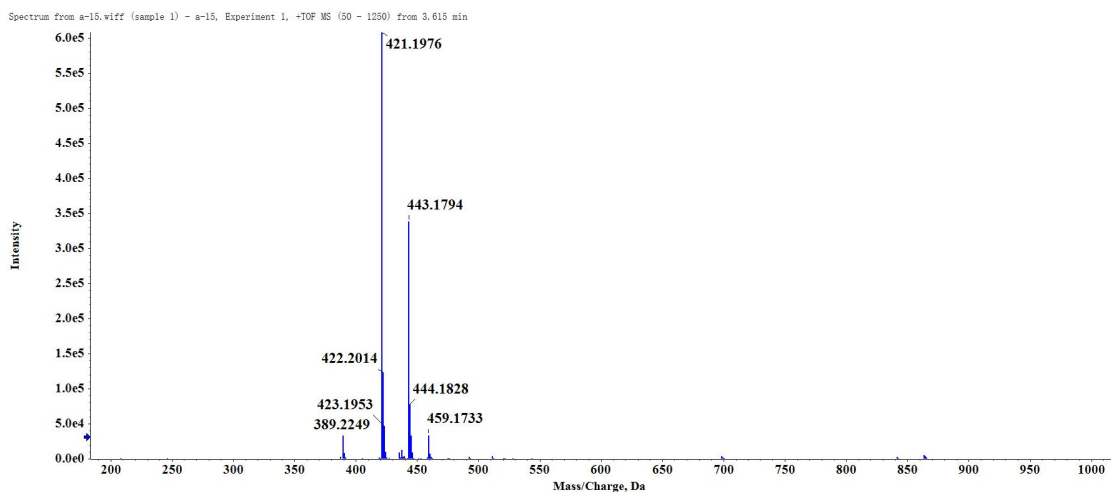

**Figure S68** HRMS (ESI) spectrum of compound **3e6**.

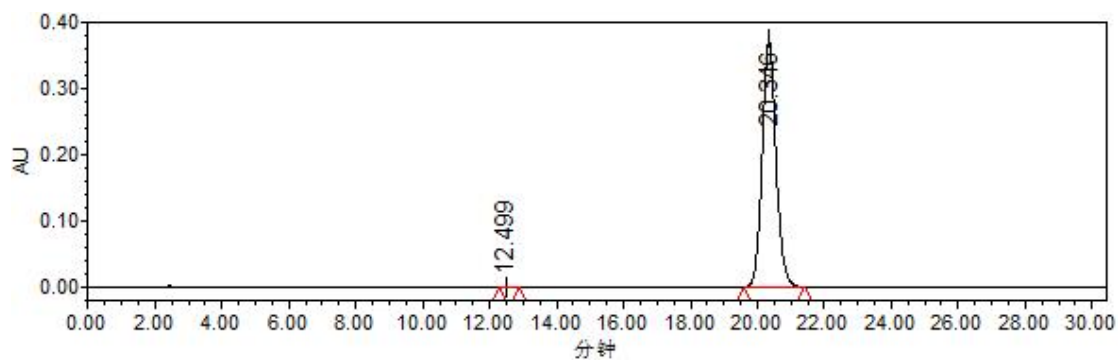

|   | Name | Retention time | Area (mV*s) | %Area | Height (mV) |
|---|------|----------------|-------------|-------|-------------|
| 1 |      | 12.480         | 14647       | 0.14  | 521         |
| 2 |      | 17.908         | 1989        | 0.02  | 114         |
| 3 |      | 20.346         | 10695950    | 99.79 | 374400      |
| 4 |      | 24.705         | 6055        | 0.06  | 216         |
|   |      |                |             |       |             |

**Figure S69** Chromatographic report of HPLC analysis of compound **3e6**.

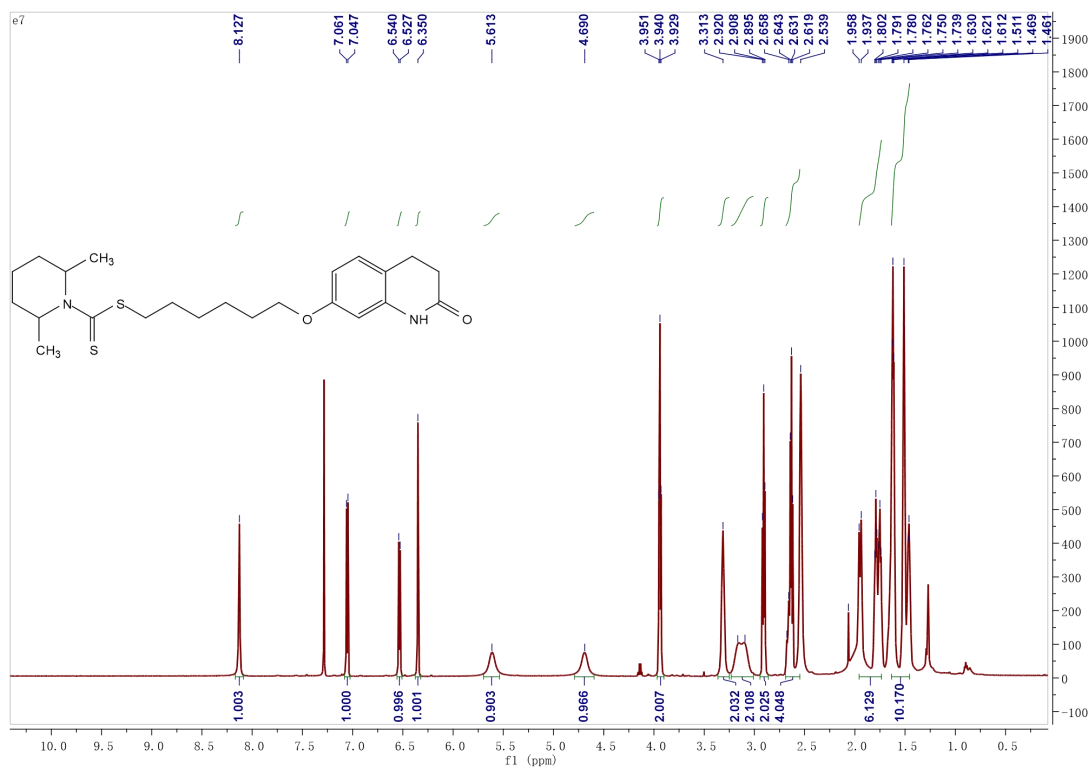

Figure S70  $^1\text{H}$  NMR chart of compound **3e7** in  $\text{CDCl}_3$ .

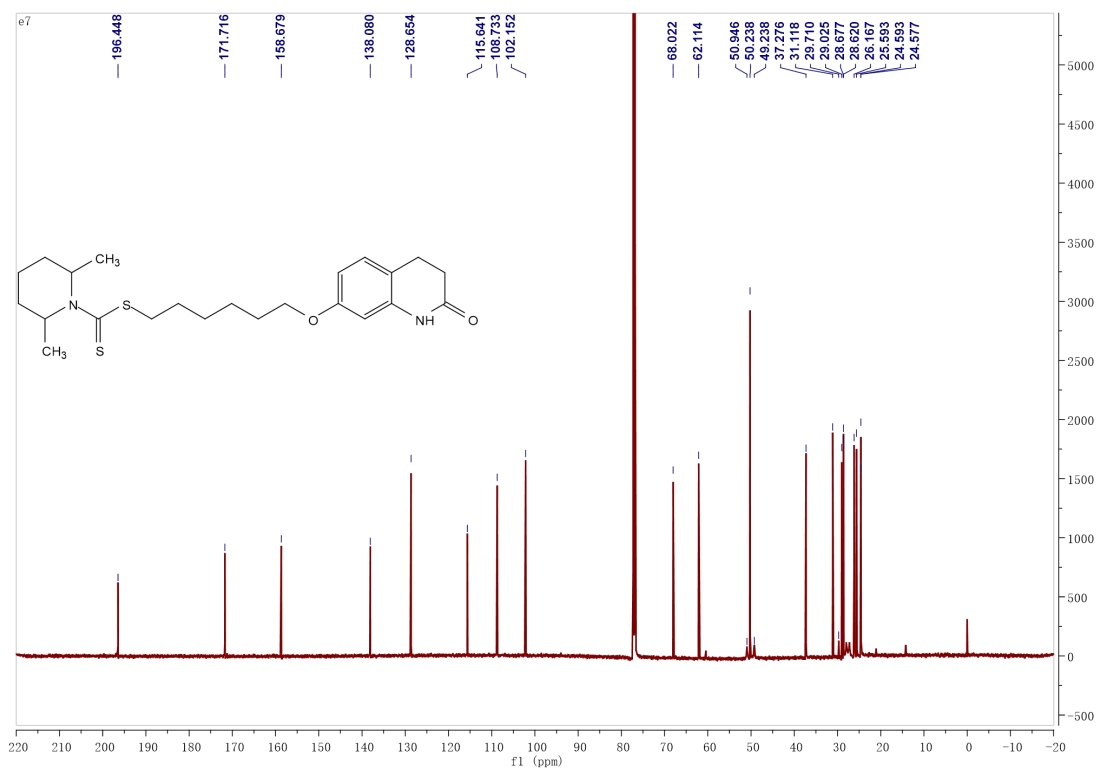

Figure S71  $^{13}\text{C}$  NMR chart of compound **3e7** in  $\text{CDCl}_3$ .

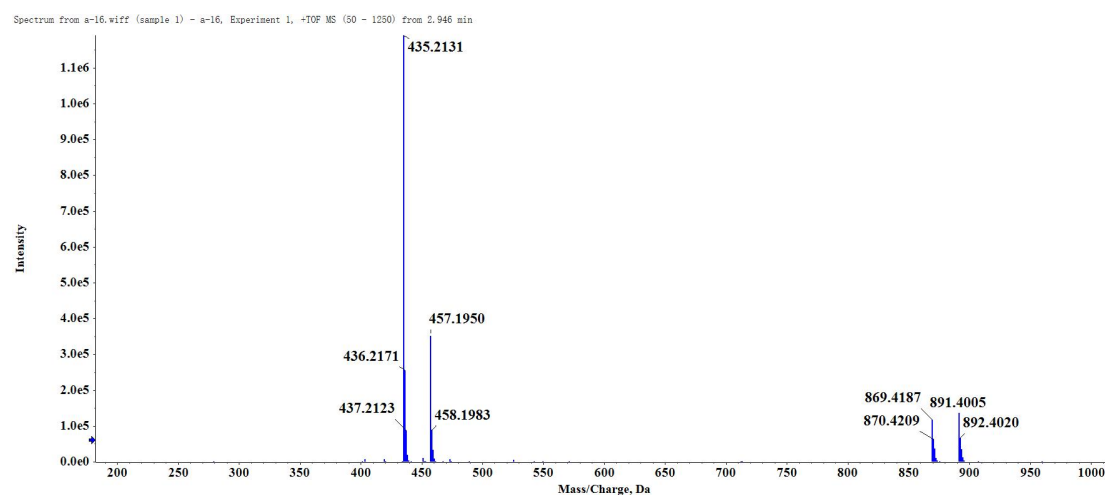

**Figure S72** HRMS (ESI) spectrum of compound **3e7**.

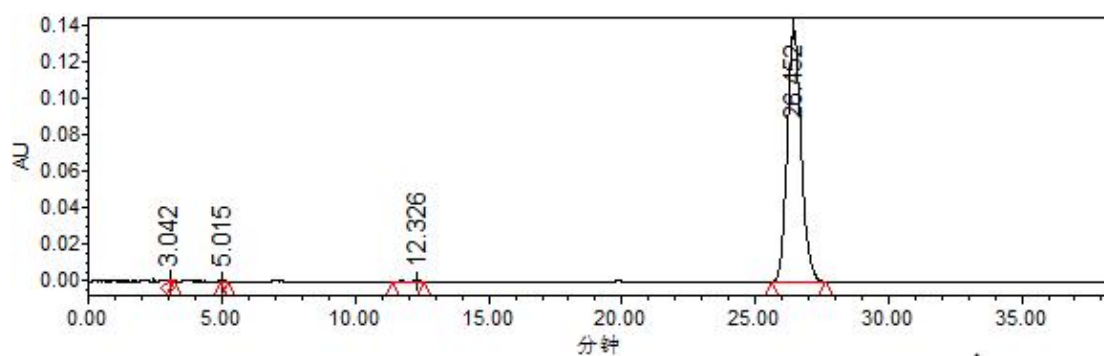

|   | Name | Retention time | Area (mV*s) | %Area | Height (mV) |
|---|------|----------------|-------------|-------|-------------|
| 1 |      | 3.042          | 4707        | 0.09  | 743         |
| 2 |      | 5.015          | 2236        | 0.04  | 330         |
| 3 |      | 12.326         | 16657       | 0.33  | 695         |
| 4 |      | 26.452         | 5027849     | 99.53 | 137706      |
|   |      |                |             |       |             |

**Figure S73** Chromatographic report of HPLC analysis of compound **3e7**.

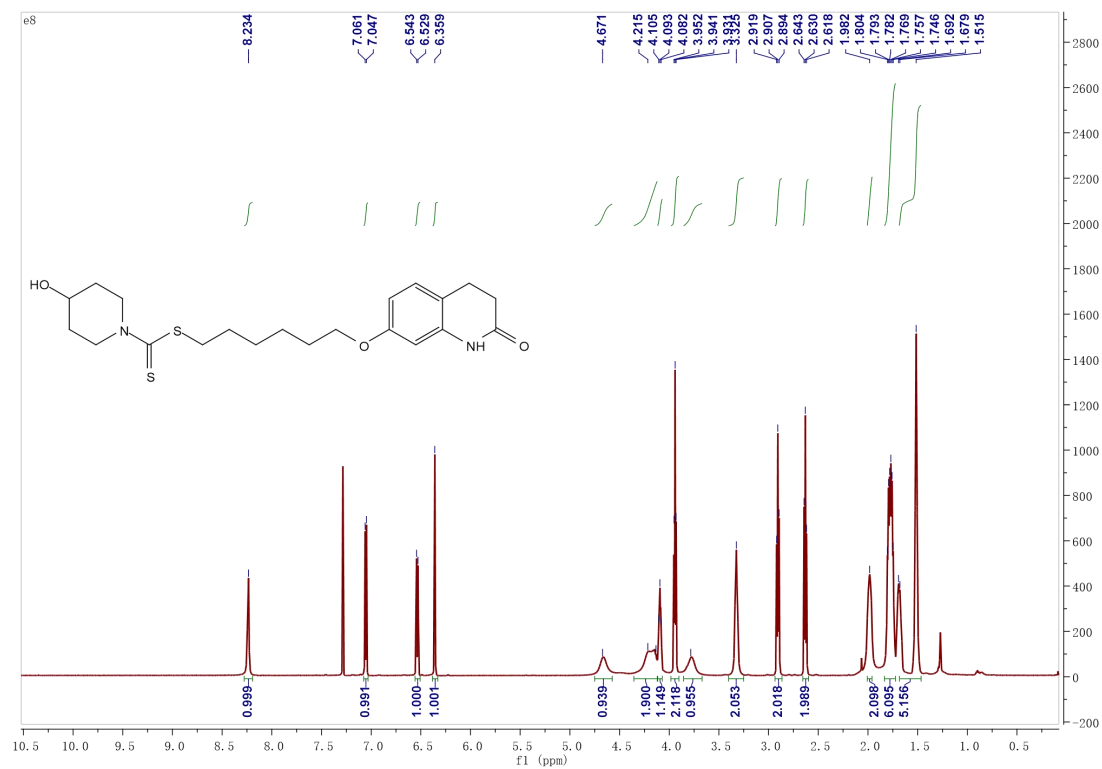

Figure S74  $^1\text{H}$  NMR chart of compound **3e8** in  $\text{CDCl}_3$ .

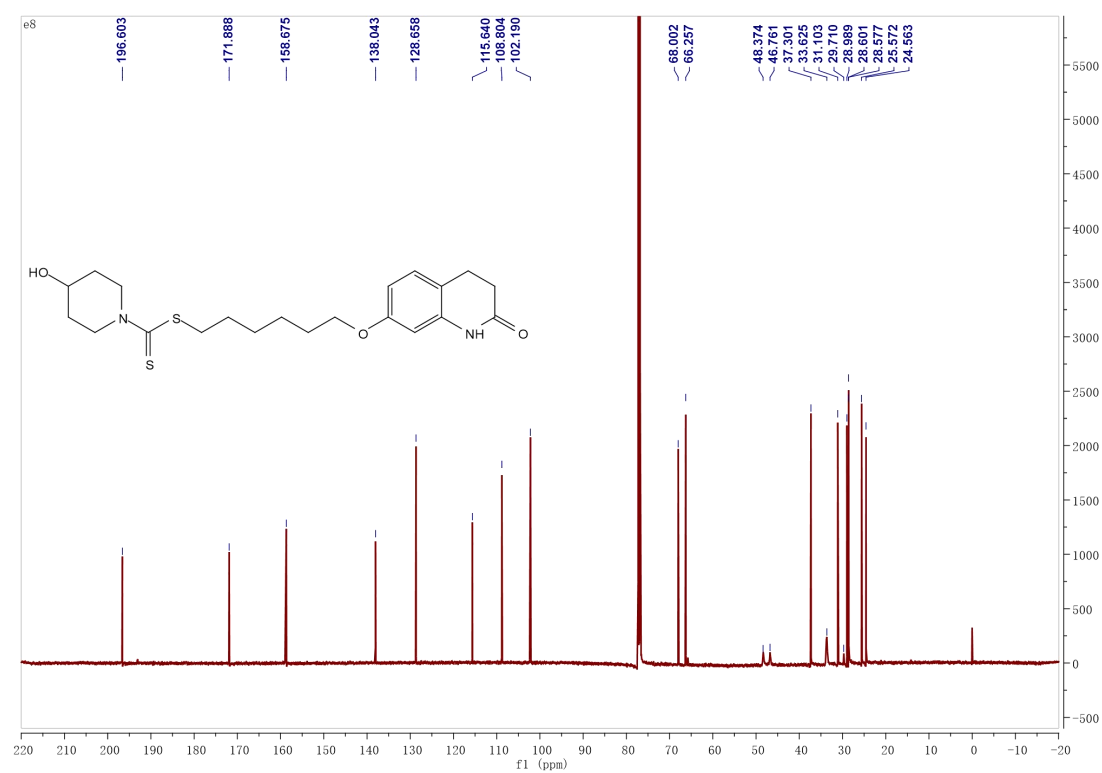

Figure S75  $^{13}\text{C}$  NMR chart of compound **3e8** in  $\text{CDCl}_3$ .

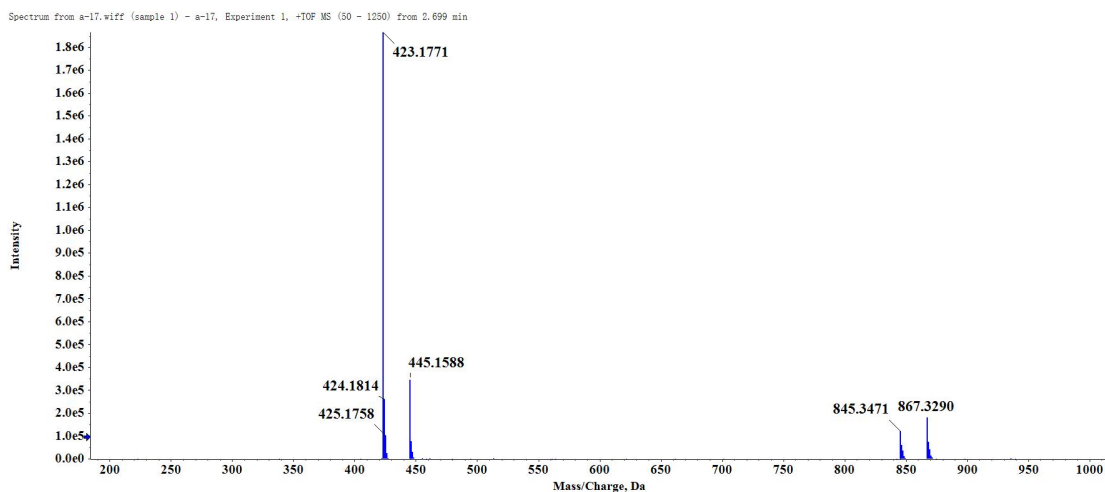

Figure S76 HRMS (ESI) spectrum of compound **3e<sub>8</sub>**.

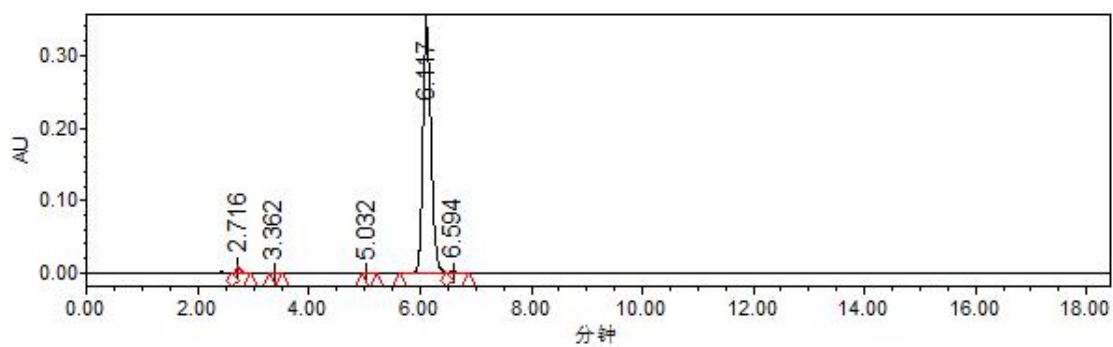

|   | Name | Retention time | Area (mV*s) | %Area | Height (mV) |
|---|------|----------------|-------------|-------|-------------|
| 1 |      | 2.716          | 52941       | 1.48  | 9777        |
| 2 |      | 3.362          | 2408        | 0.07  | 449         |
| 3 |      | 5.032          | 1972        | 0.06  | 322         |
| 4 |      | 6.117          | 3507432     | 97.91 | 339192      |
| 5 |      | 6.594          | 17450       | 0.49  | 1536        |

Figure S77 Chromatographic report of HPLC analysis of compound **3e<sub>8</sub>**.

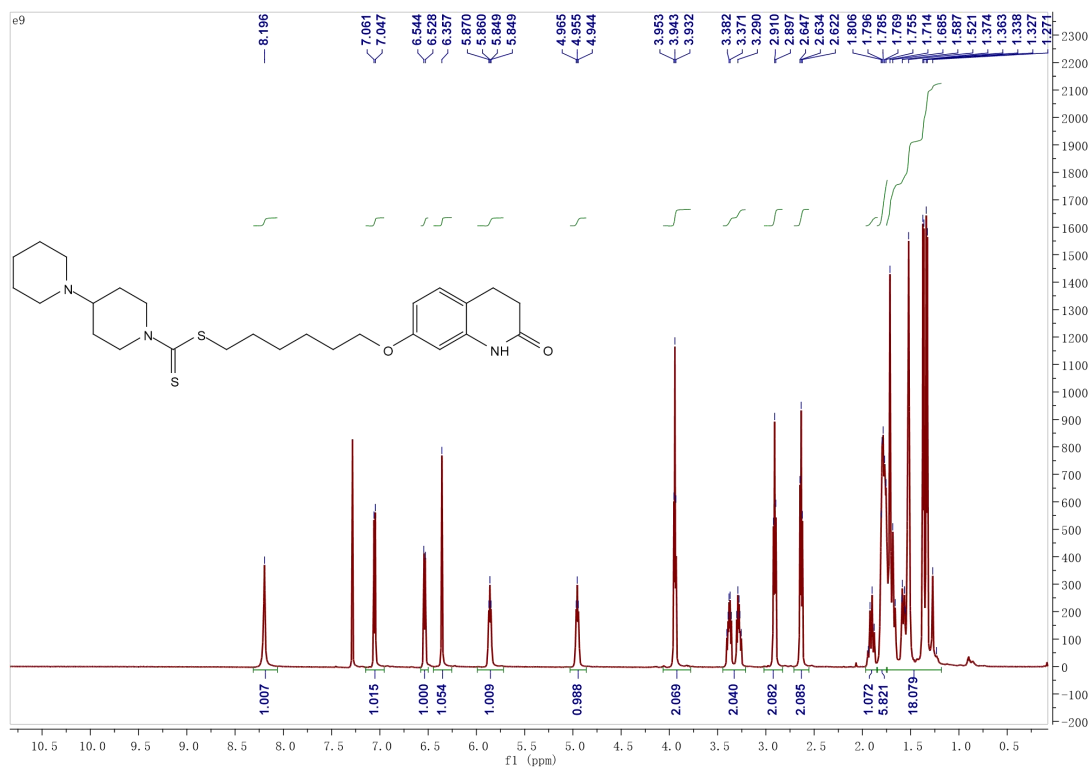

Figure S78  $^1\text{H}$  NMR chart of compound **3e9** in  $\text{CDCl}_3$ .

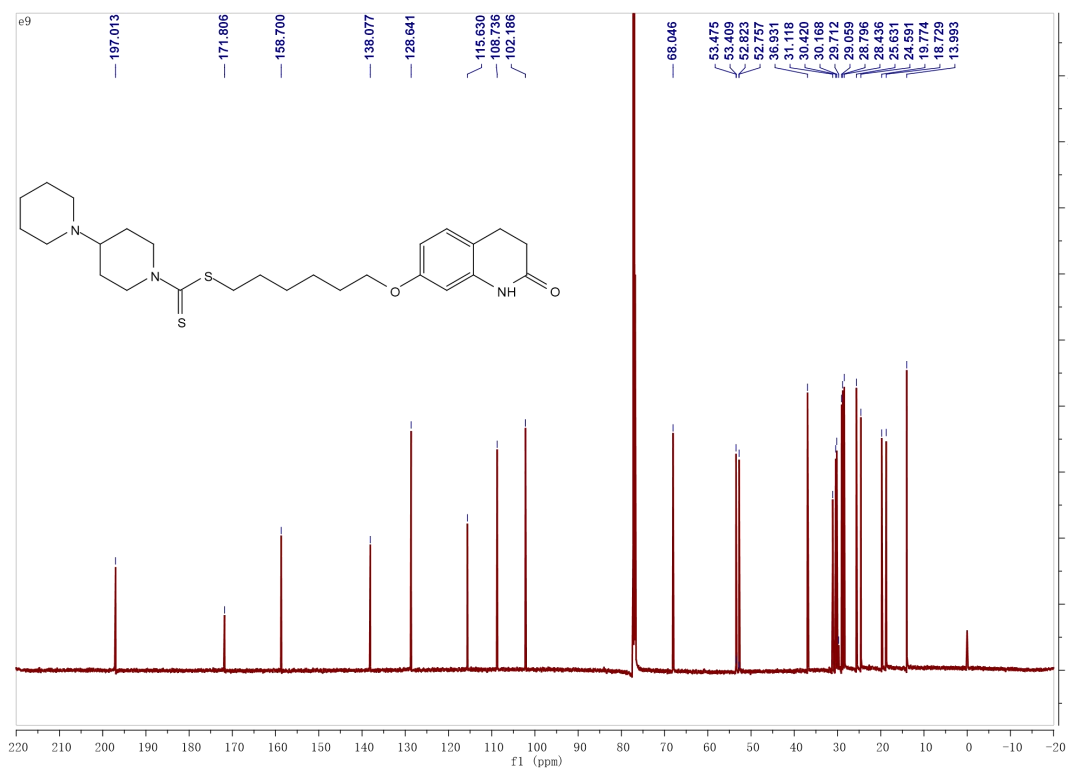

Figure S79  $^{13}\text{C}$  NMR chart of compound **3e9** in  $\text{CDCl}_3$ .

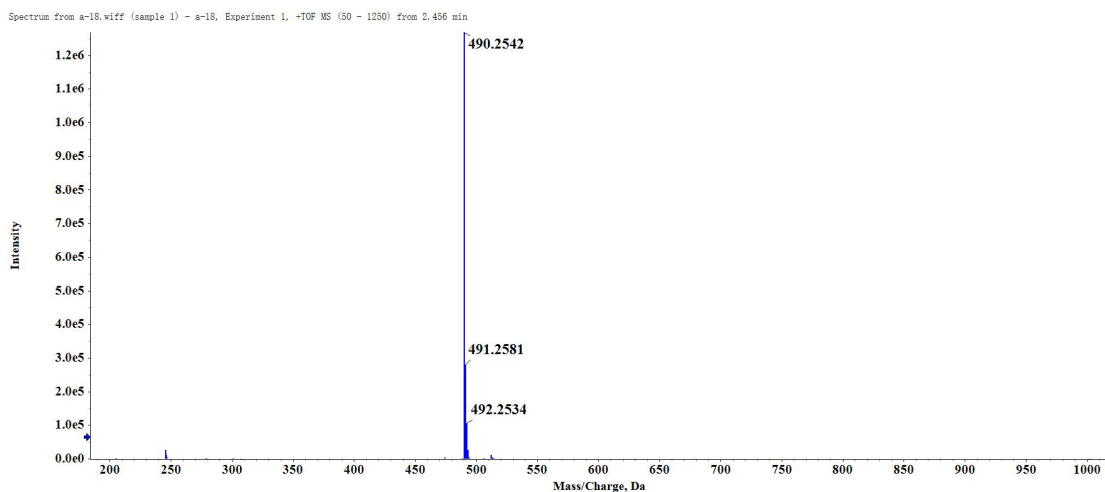

**Figure S80** HRMS (ESI) spectrum of compound **3e9**.

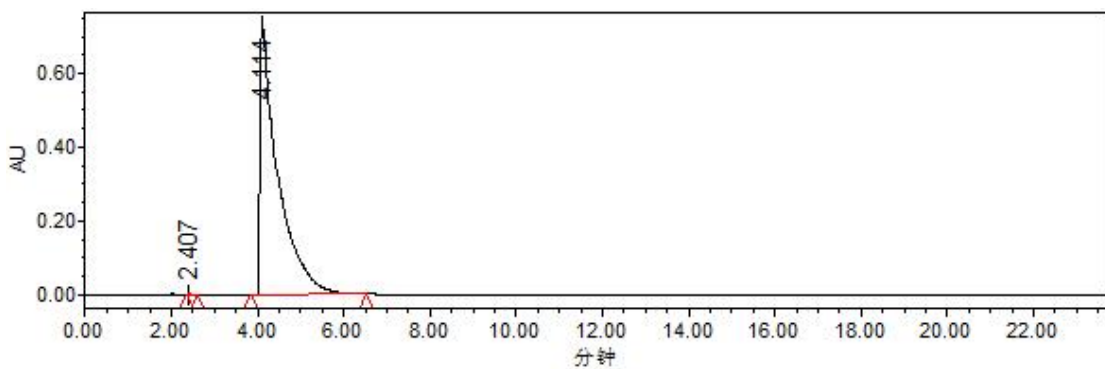

|   | Name | Retention time | Area (mV*s) | %Area | Height (mV) |
|---|------|----------------|-------------|-------|-------------|
| 1 |      | 2.407          | 11916       | 0.06  | 2513        |
| 2 |      | 4.114          | 21233627    | 99.94 | 727678      |
|   |      |                |             |       |             |

**Figure S81** Chromatographic report of HPLC analysis of compound **3e9**.

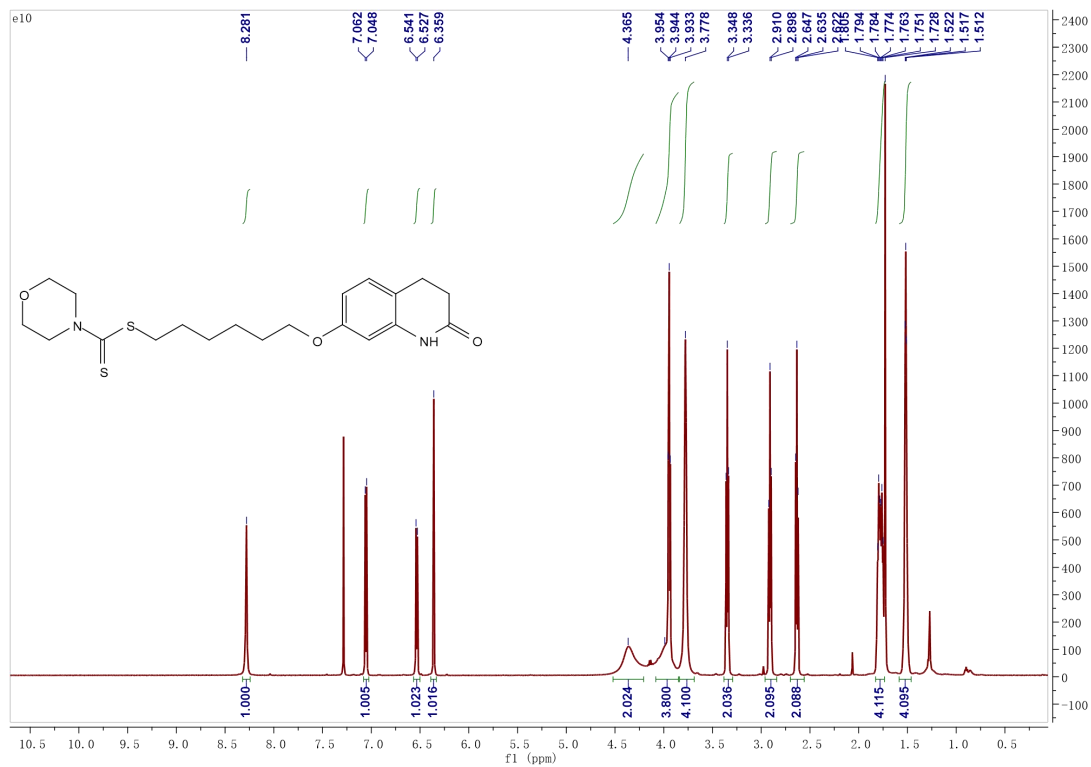

Figure S82 <sup>1</sup>H NMR chart of compound **3e<sub>10</sub>** in CDCl<sub>3</sub>.

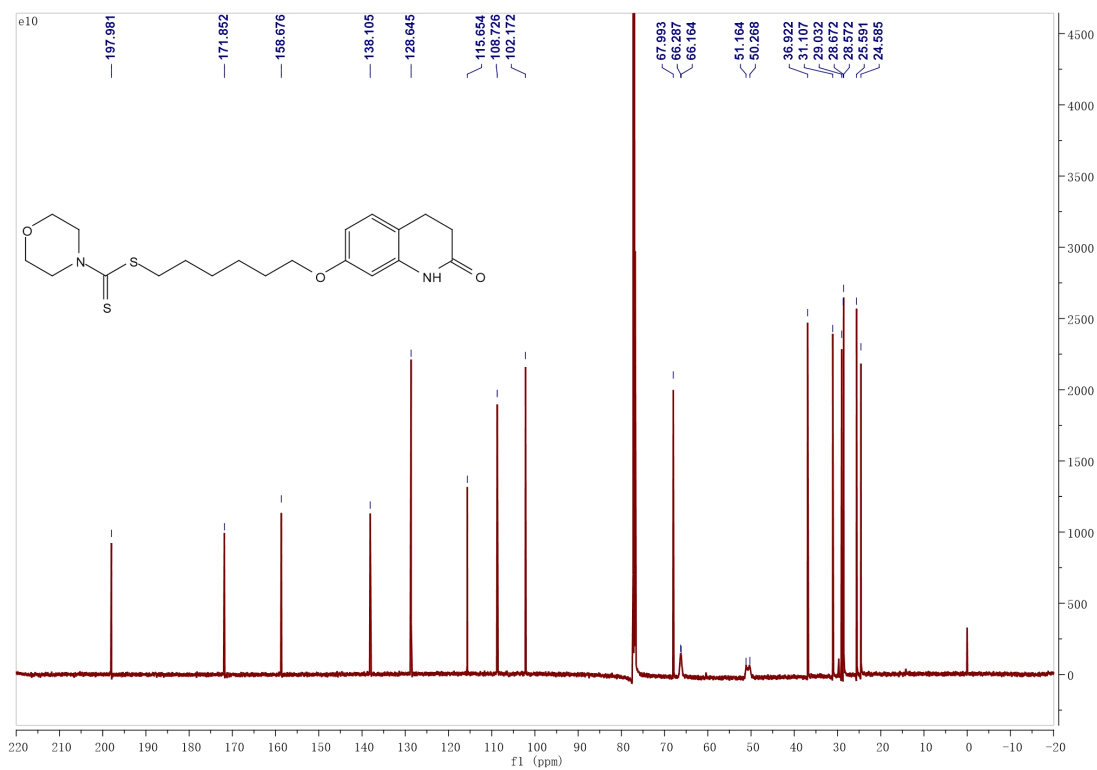

Figure S83 <sup>13</sup>C NMR chart of compound **3e<sub>10</sub>** in CDCl<sub>3</sub>.



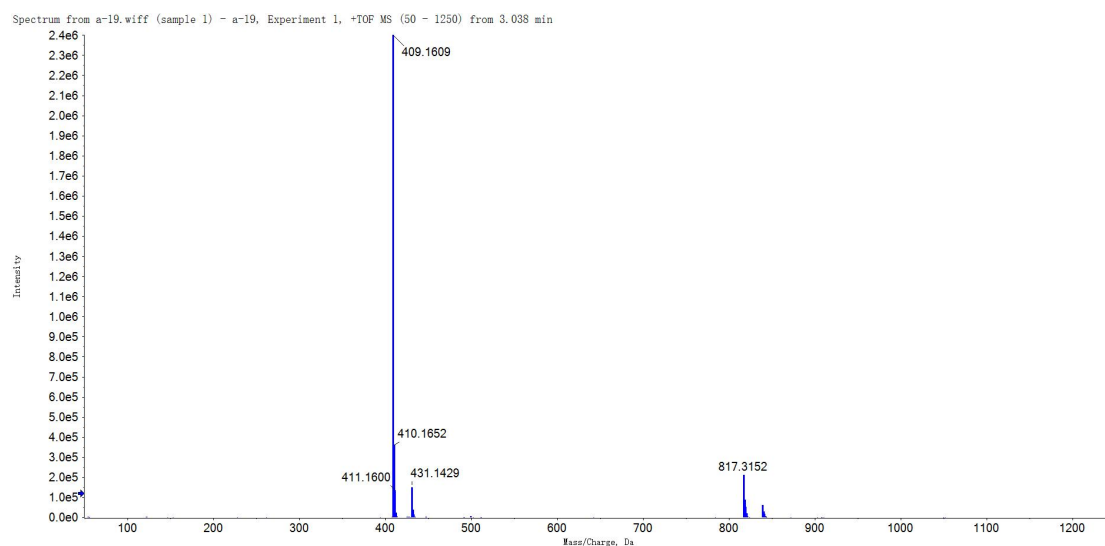

Figure S84 HRMS (ESI) spectrum of compound **3e<sub>10</sub>**.

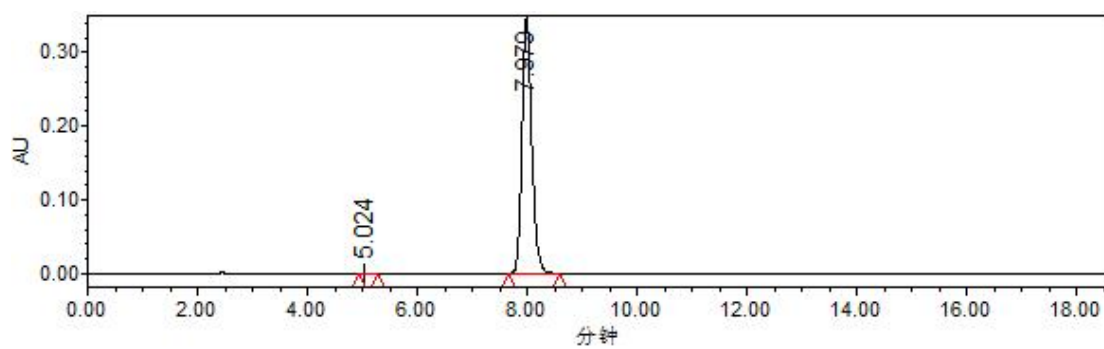

|   | Name | Retention time | Area (mV*s) | %Area | Height (mV) |
|---|------|----------------|-------------|-------|-------------|
| 1 |      | 5.024          | 3015        | 0.07  | 426         |
| 2 |      | 7.979          | 4325077     | 99.93 | 347322      |
|   |      |                |             |       |             |

Figure S85 Chromatographic report of HPLC analysis of compound **3e<sub>10</sub>**.

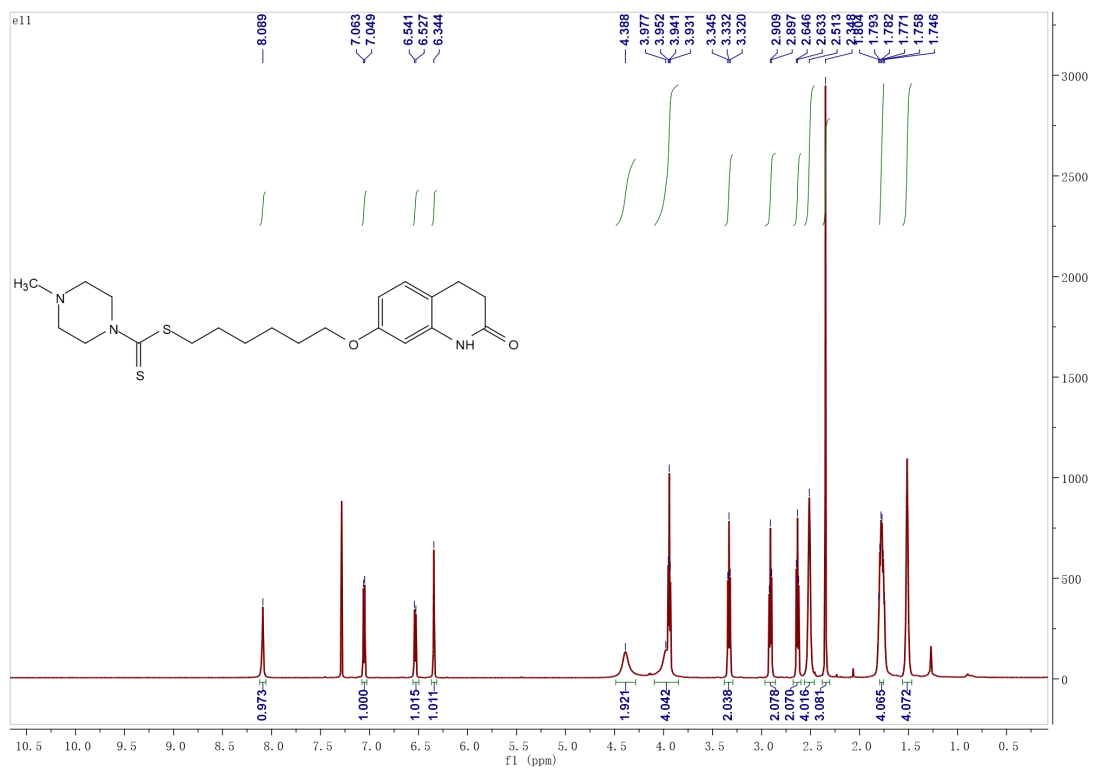

Figure S86 <sup>1</sup>H NMR chart of compound **3e<sub>11</sub>** in CDCl<sub>3</sub>.

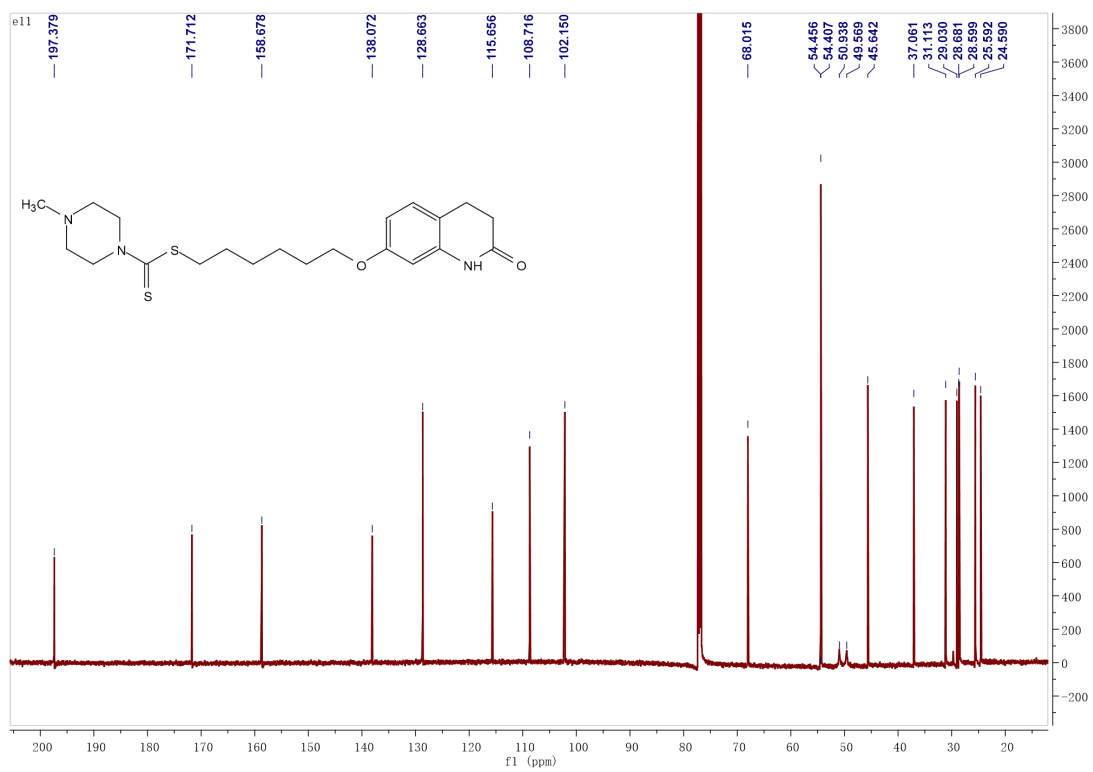

Figure S87 <sup>13</sup>C NMR chart of compound **3e<sub>11</sub>** in CDCl<sub>3</sub>.

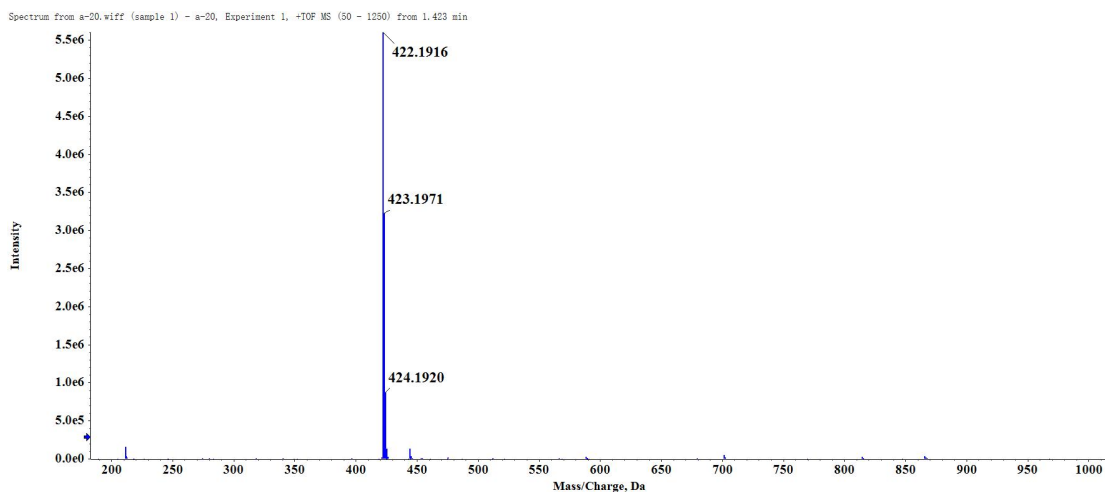

**Figure S88** HRMS (ESI) spectrum of compound **3e<sub>11</sub>**.

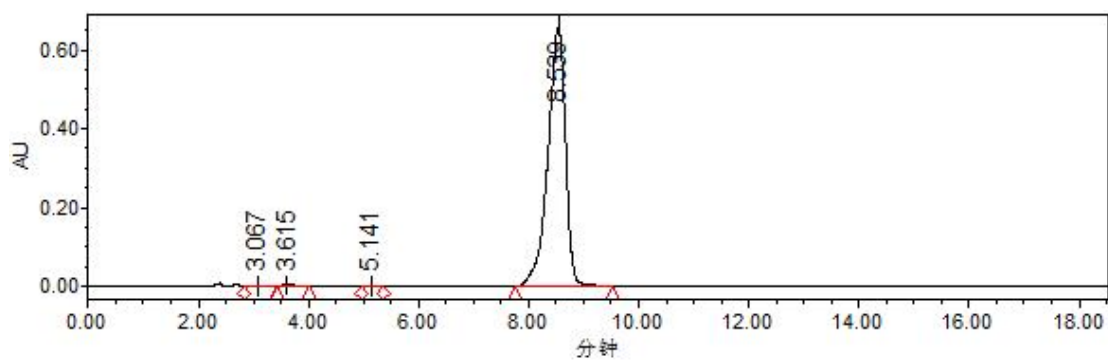

|   | Name | Retention time | Area (mV*s) | %Area | Height (mV) |
|---|------|----------------|-------------|-------|-------------|
| 1 |      | 3.067          | 37862       | 0.26  | 1817        |
| 2 |      | 3.615          | 64059       | 0.44  | 4451        |
| 3 |      | 5.141          | 17595       | 0.12  | 1813        |
| 4 |      | 8.539          | 14533412    | 99.18 | 655479      |
|   |      |                |             |       |             |

**Figure S89** Chromatographic report of HPLC analysis of compound **3e<sub>11</sub>**.

### 3. The error analysis of the HRMS results

**Table S1** The error analysis of the HRMS results of compound **3a-i**, **3e<sub>1</sub>-e<sub>11</sub>**

| Compound               | M <sub>0</sub> | M <sub>t</sub> | error analysis value (ppm) <sup>a</sup> |
|------------------------|----------------|----------------|-----------------------------------------|
| <b>3a</b>              | 351.1196       | 351.1196       | 0                                       |
| <b>3b</b>              | 365.1352       | 365.1348       | 1.01                                    |
| <b>3c</b>              | 379.1509       | 379.1497       | 3.16                                    |
| <b>3d</b>              | 393.1665       | 393.1659       | 1.53                                    |
| <b>3e</b>              | 407.1822       | 407.1821       | 0.25                                    |
| <b>3f</b>              | 421.1978       | 421.1980       | -0.47                                   |
| <b>3g</b>              | 435.2135       | 435.2140       | -1.15                                   |
| <b>3h</b>              | 449.2291       | 449.2292       | -0.22                                   |
| <b>3i</b>              | 463.2448       | 463.245        | -0.43                                   |
| <b>3e<sub>1</sub></b>  | 367.1509       | 367.1506       | 0.82                                    |
| <b>3e<sub>2</sub></b>  | 381.1665       | 381.1666       | -0.26                                   |
| <b>3e<sub>3</sub></b>  | 395.1822       | 395.181        | 3.04                                    |
| <b>3e<sub>4</sub></b>  | 393.1665       | 393.1655       | 2.54                                    |
| <b>3e<sub>5</sub></b>  | 421.1978       | 421.198        | -0.47                                   |
| <b>3e<sub>6</sub></b>  | 421.1978       | 421.1976       | 0.47                                    |
| <b>3e<sub>7</sub></b>  | 435.2135       | 435.2131       | 0.92                                    |
| <b>3e<sub>8</sub></b>  | 423.1771       | 423.1771       | 0                                       |
| <b>3e<sub>9</sub></b>  | 490.2557       | 490.2542       | 3.06                                    |
| <b>3e<sub>10</sub></b> | 409.1614       | 409.1609       | 1.22                                    |
| <b>3e<sub>11</sub></b> | 422.1935       | 422.1916       | 4.50                                    |

Note: <sup>a</sup> error analysis value: error analysis value (ppm)=(M<sub>0</sub>-M<sub>t</sub>)/M<sub>0</sub>×10<sup>6</sup>; M<sub>0</sub>: theoretical value, M<sub>t</sub>: measured value.

#### 4. Molecular dynamics simulation

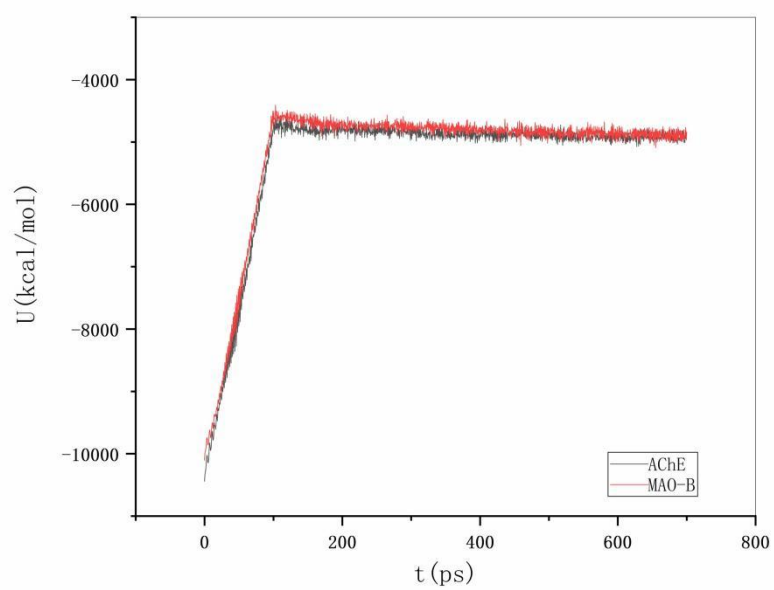

**Figure S90** The evaluation of potential energy of complex of **3e**-hAChE (marked in dark) and **3e**-hMAO-B (marked in red).
